# Supplementary material for: Comparative functional genomic analysis of Alzheimer’s affected and naturally aging brains
Source: PeerJ journal article supplement (doi:10.7717/peerj.8682), 2020-03-20
Supplement: 20_02_27_Revision_PeerJ_Supplementary_MaterialSep27_v_6.0_KT_staff.pdf [file 20_02_27_Revision_PeerJ_Supplementary_MaterialSep27_v_6.0_KT_staff.pdf]

# Comparative functional genomic analysis of Alzheimer's affected and naturally aging brains

Yi-Shian Peng<sup>\*1</sup>, Chia-Wei Tang<sup>1</sup>, Yi-Yun Peng<sup>1</sup>, Hung Chang<sup>1</sup>, Chien-Lung Chen<sup>2</sup>, Shu-Lin Guo<sup>3,4</sup>, Li-Ching Wu<sup>1</sup>, Min-Chang Huang<sup>5</sup>, Hoong-Chien Lee<sup>\*1,5</sup>

<sup>1</sup> Department of Biomedical Sciences and Engineering, National Central University, Taoyuan, Taiwan 32001

<sup>2</sup> Department of Nephrology, Landseed Hospital, Taoyuan, Taiwan 324

<sup>3</sup> Department of Anesthesiology, Cathay General Hospital, Taipei, Taiwan 106

<sup>4</sup> Department of Anesthesiology, Tri-Service General Hospital and National Defense Medical Center, Taipei, Taiwan 114

<sup>5</sup> Department of Physics, Chung Yuan Christian University, Taoyuan, Taiwan 32023

\*Co-correspondent author, HCL: [hcllee12345@gmail.com](mailto:hcllee12345@gmail.com); YSP: [bim962511@gmail.com](mailto:bim962511@gmail.com)

## Supplementary Figures

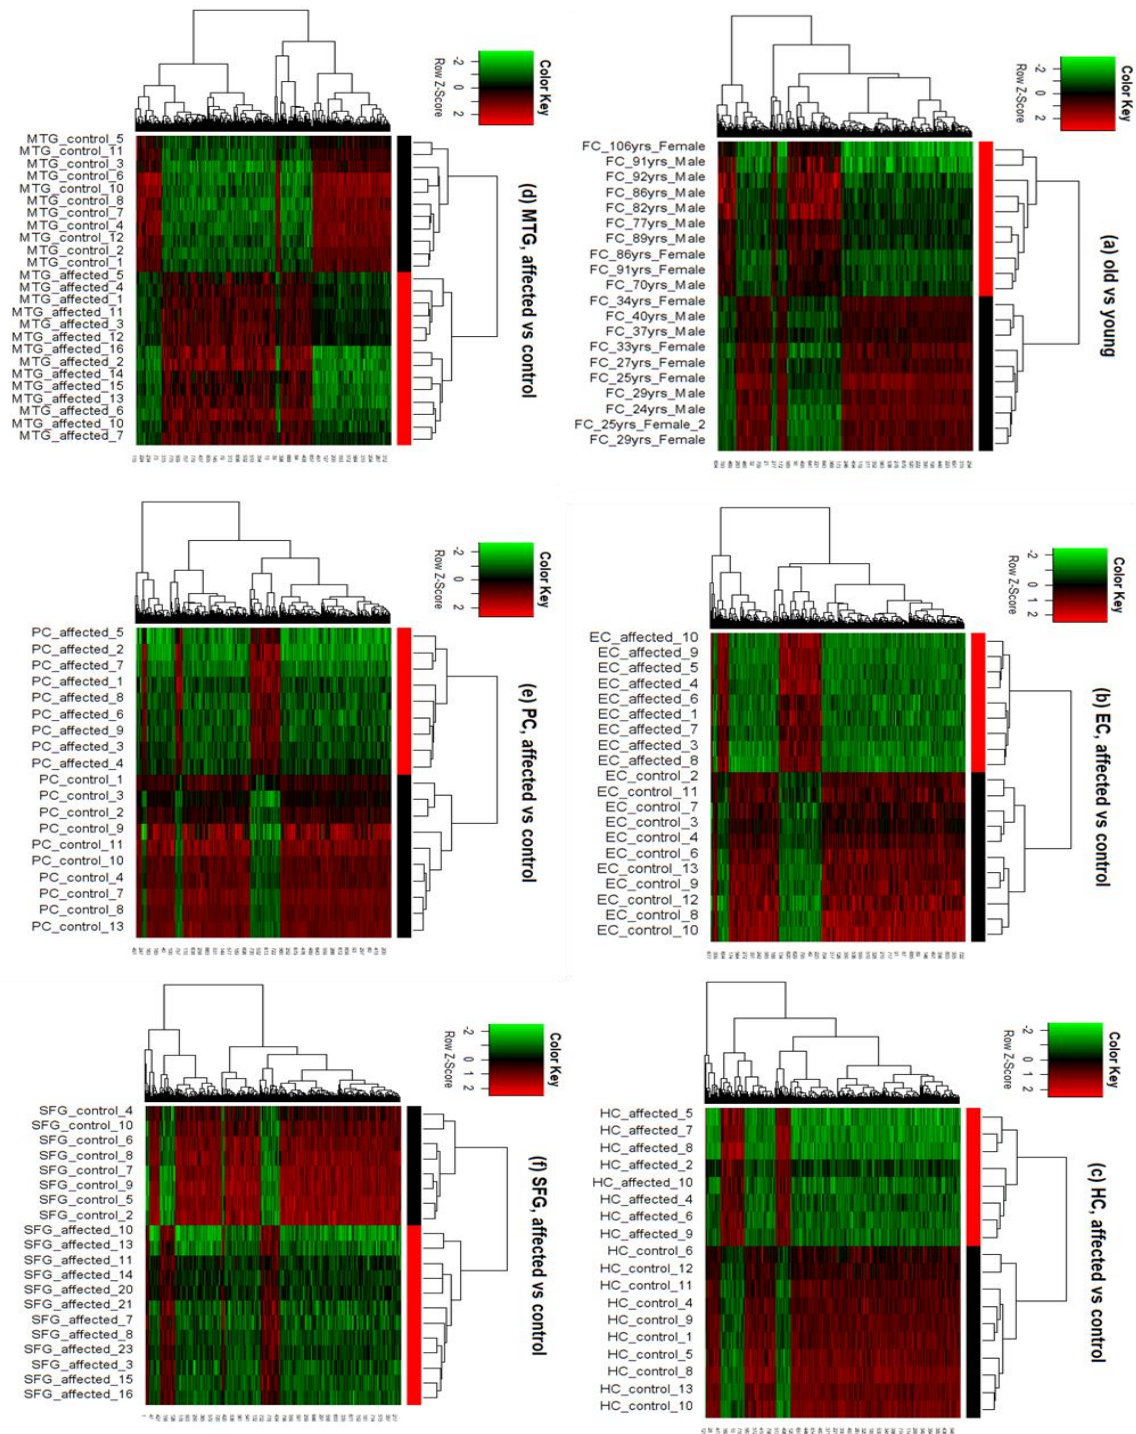

### Supplementary Figure 1

**Two-way hierarchical clustering of selected datasets** For each case the heat map corresponds to a reduced dataset (Supplementary Table 1) obtained by pruning the original dataset so that the PCA score is greater than 0.90 and there is perfect test-control separation in the heatmap. Differentially expressed genes (DEGs) were by LIMMA in R environment with case-dependent FDR: for AG,  $7.50E-04$ ; EC,  $4.0E-06$ ; HC,  $1.0E-05$ ; MTG,  $5.0E-06$ ; PC,  $1.0E-04$ ; SFG,  $1.25E-05$ . In all cases  $\log_2$ -fold change  $|FC| > 1$ . (a) AG, or old (70 and older) vs. young (40 and younger). (b) to (f), respectively the five brain regions: EC, entorhinal cortex; HC, hippocampus; MTG, medial temporal gyrus; PC, posterior cingulate; SFG, superior frontal gyrus.

(Supplementary Figure 2, part 1/2)

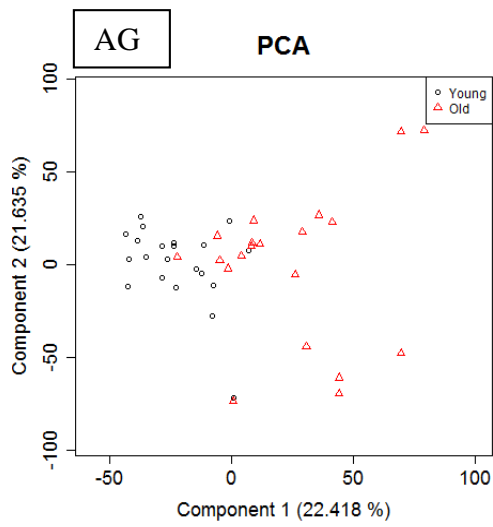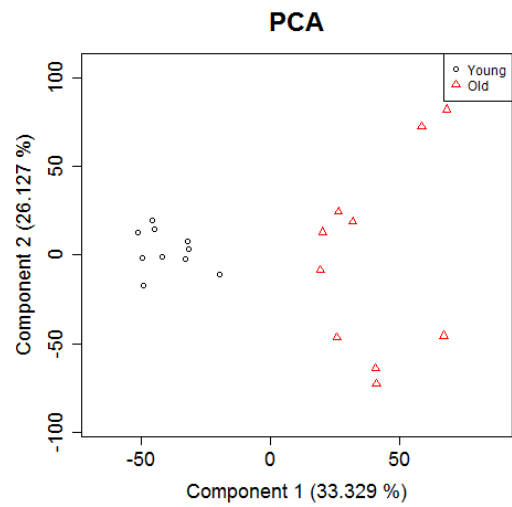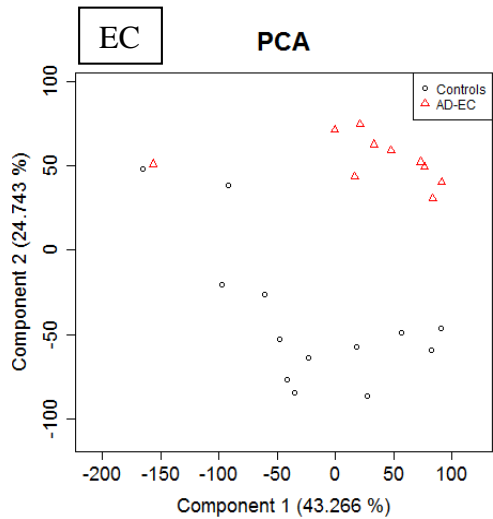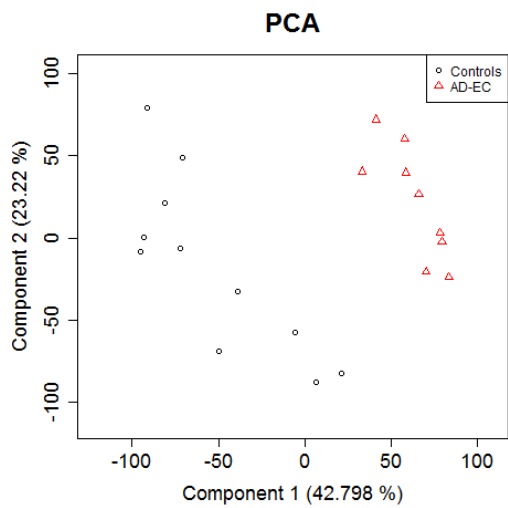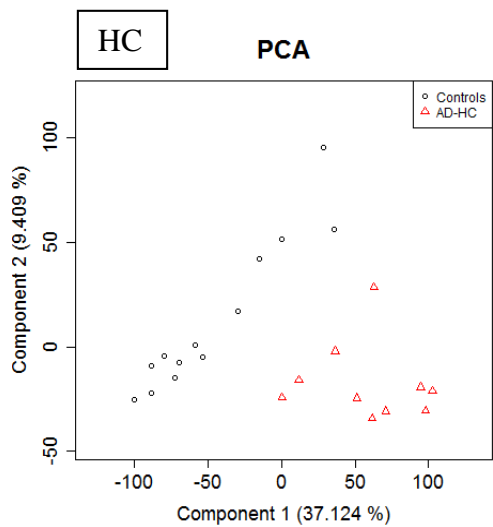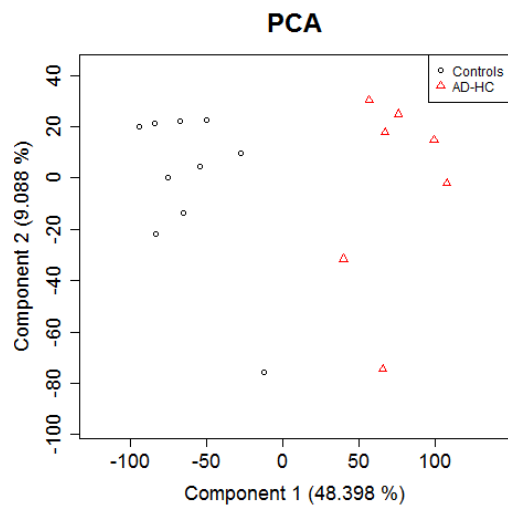

(Supplementary Figure 2, part 2/2)

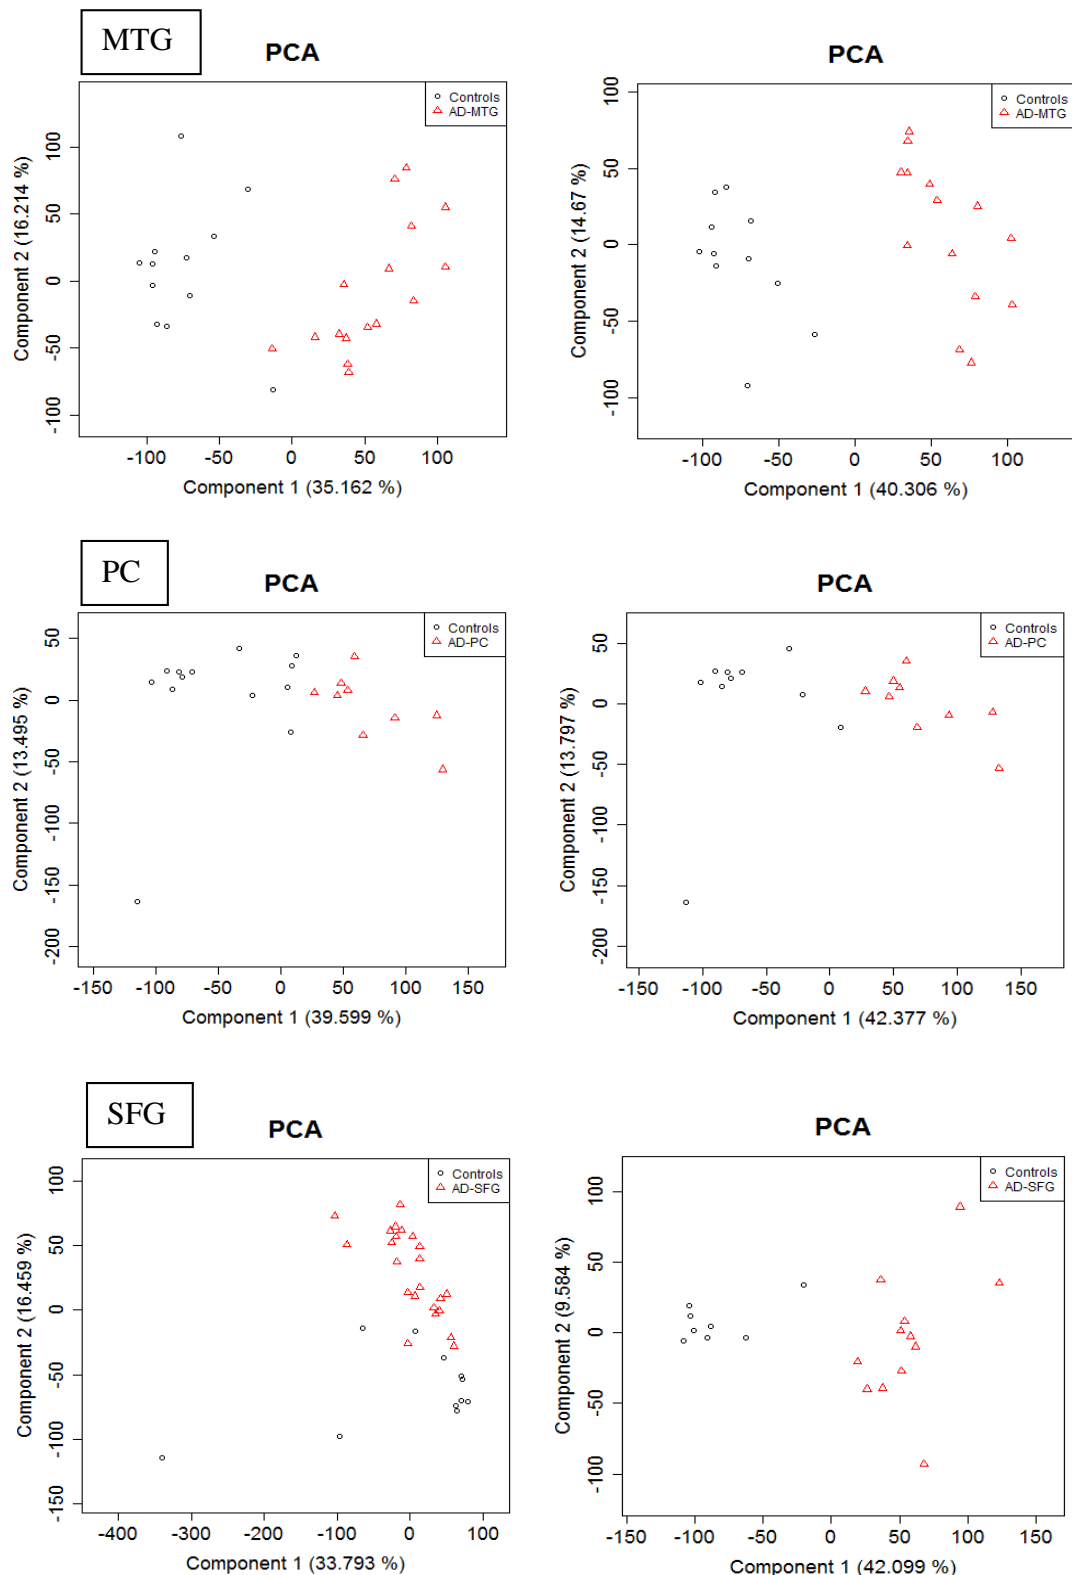

### Supplementary Figure 2

**PCA plots of the original and reduced datasets** For each dataset: left, plot for original set; right, reduced set analyze in this work. Set sizes and PCA scores given in Supplementary Table 1. Abbreviations: AG, normal aging; AD, Alzheimer's disease affected patients; EC, entorhinal cortex; HC, hippocampus; MTG, medial temporal gyrus; PC, posterior cingulate; SFG, superior frontal gyrus.

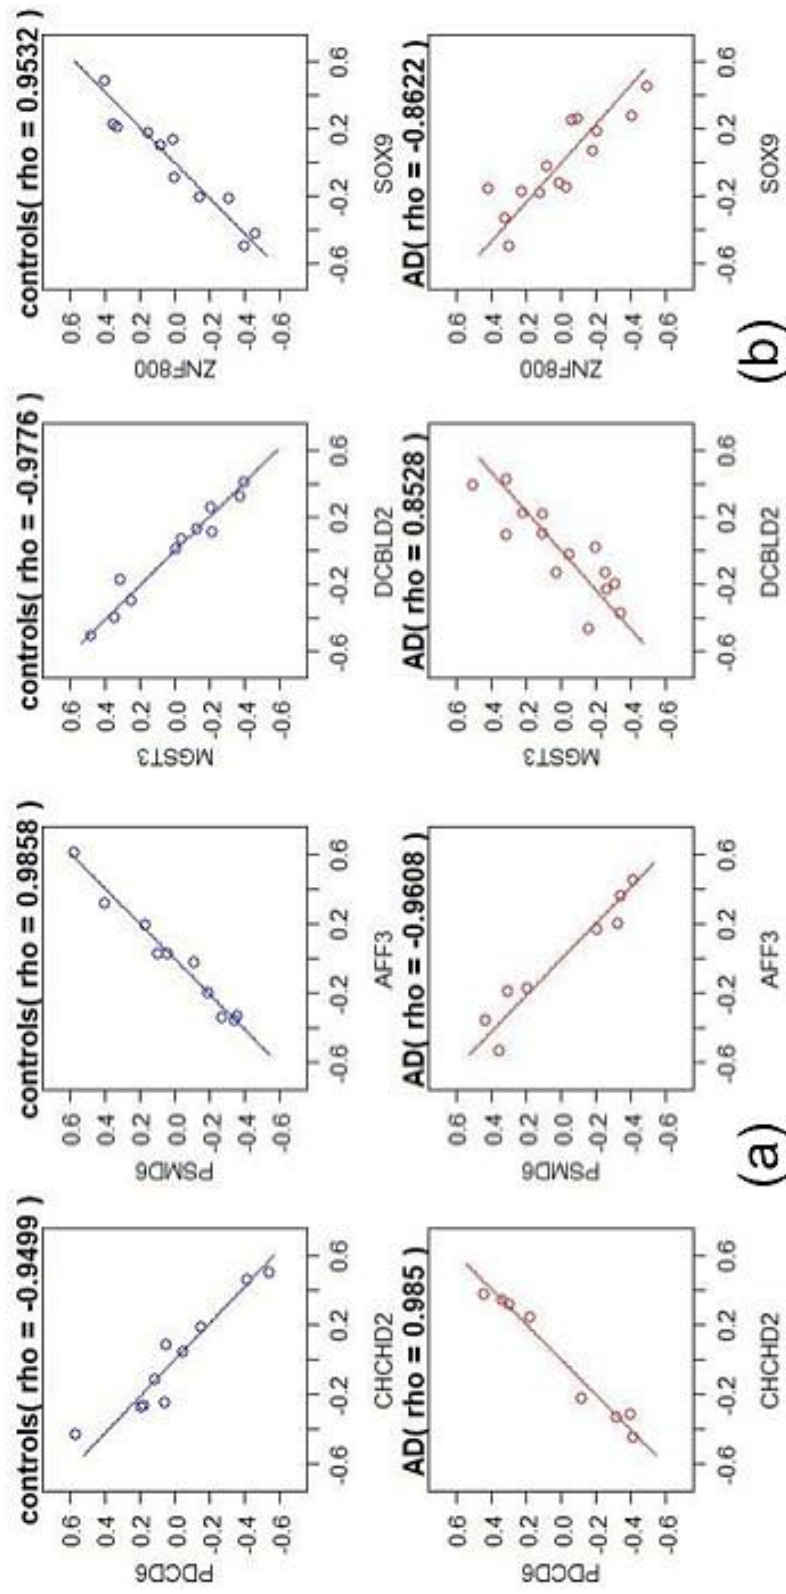

**Supplementary Figure 3**

**Examples of gene-pair correlation plots** Plotted along the x- and y-axes are normalized t-statistics of a pair of genes. Each column of two panels gives the plots from control cases (top) and region-specific AD patients (bottom). (a) From the hippocampus (HC) region. The pair CHCHD2-PCDC6 in the left column has negative slope in control and positive slope in HC, hence exhibits GOC. The pair AFF3-PSMD6 in the right column exhibits LOC. (b) From the medial temporal gyrus (MTG) region. The pair DCBLD2-MGST3 (left column) exhibits GOC, the pair SOX9-ZNF600 (right column) exhibits LOC.

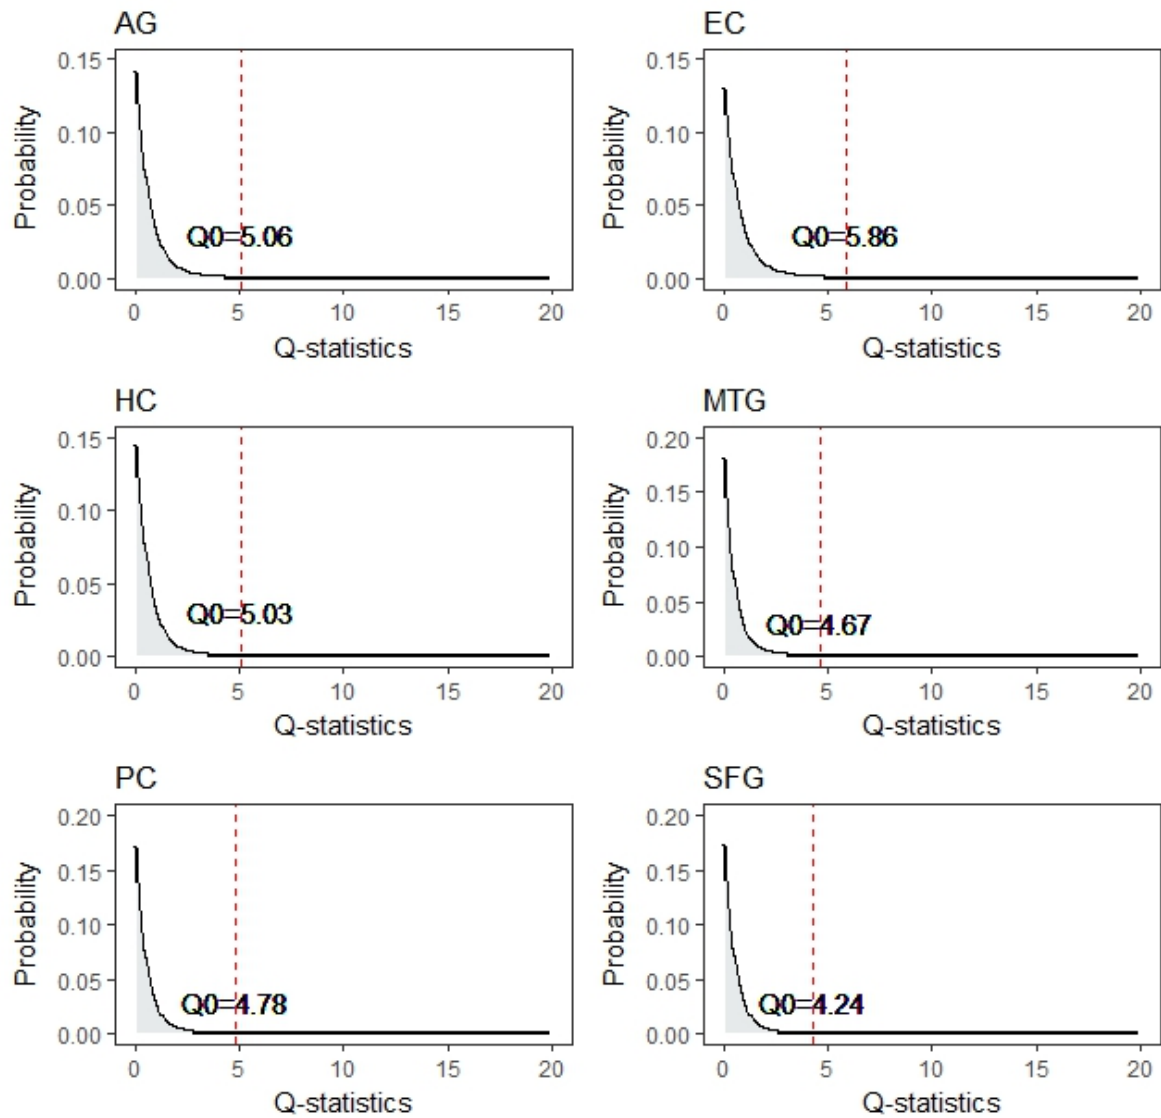

**Supplementary Figure 4**

**Q-statistics distribution of gene-pair correlation in the 6 datasets** Pairs with  $Q > Q_0$ , or those to the right of the red dash line, were selected as DCE gene pairs; they constitute 0.1 % of the total number of pairs. Abbreviations: AG, normal aging; EC, entorhinal cortex; HC, hippocampus; MTG, medial temporal gyrus; PC, posterior cingulate; SFG, superior frontal gyrus.

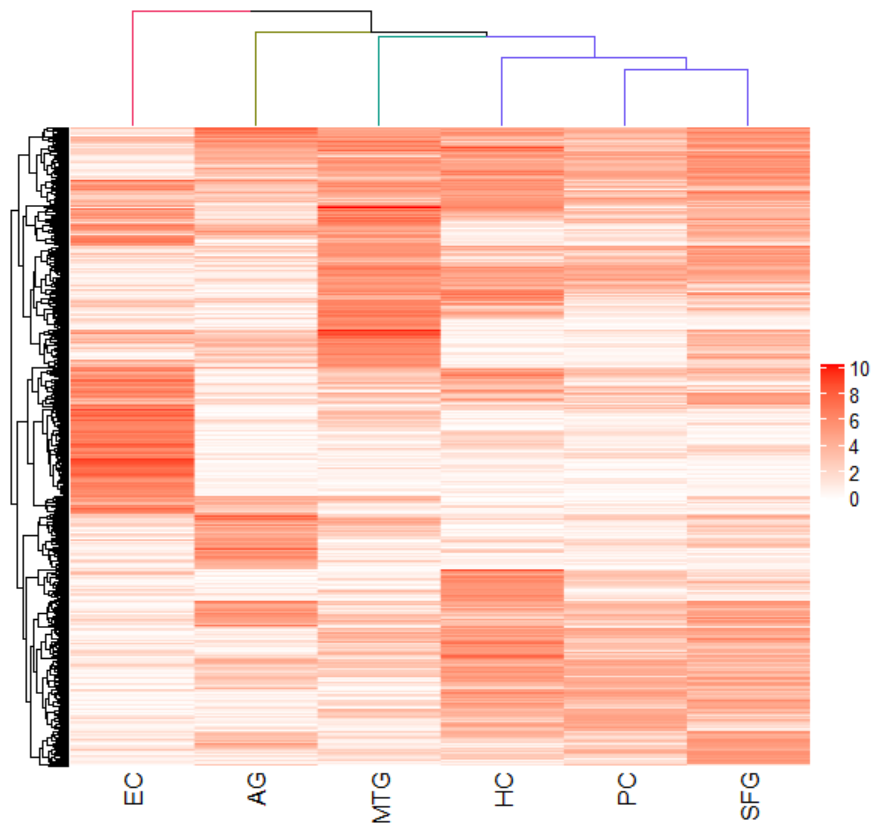

**Supplementary Figure 5.**

**DEG two-way clustering of the six cases** The two-way clustering is based on  $-\log_{10}(q)$  values of the 3,355 genes in the union of the six curated DEG sets. Abbreviation: AG, normal aging; EC, entorhinal cortex; HC, hippocampus; MTG, medial temporal gyrus; PC, posterior cingulate; SFG, superior frontal gyrus.

## Supplementary Tables

**Supplementary Table 1. Microarray datasets used in the present study** The aging (AG) dataset is old age (>70 y) versus young age (<40 y) and the ALZ datasets are AD-affected patients versus normal from five brain regions: EC, entorhinal cortex; HC, hippocampus; MTG, medial temporal gyrus; PC, posterior cingulate; SFG, superior frontal gyrus. For each case dataset was reduced in size from the original set by pruning arrays to achieve a PCA score of greater than 0.90 and perfect test-control separation in a two-way hierarchical clustering on selected DEGs (by LIMMA, see Supplementary Table 4). Complete samples IDs used in study may be accessed at the Figshare database link: [10.6084/m9.figshare.8952938](https://doi.org/10.6084/m9.figshare.8952938)

| Case | Original dataset |           | Reduced dataset used in study |           | Reference                                                                                       |
|------|------------------|-----------|-------------------------------|-----------|-------------------------------------------------------------------------------------------------|
|      | size             | PCA score | size                          | PCA score |                                                                                                 |
| AG   | 20 vs. 21        | 0.85      | 10 vs. 10                     | 1.00      | GEO acc. no. <a href="https://www.ncbi.nlm.nih.gov/geo/query/acc.cgi?acc=GSE53890">GSE53890</a> |
| EC   | 10 vs. 13        | 0.71      | 9 vs. 11                      | 0.91      | GEO acc. no. <a href="https://www.ncbi.nlm.nih.gov/geo/query/acc.cgi?acc=GSE5281">GSE5281</a>   |
| HC   | 10 vs. 13        | 0.88      | 8 vs. 10                      | 1.00      |                                                                                                 |
| MTG  | 16 vs. 12        | 0.97      | 14 vs. 11                     | 1.00      |                                                                                                 |
| PC   | 9 vs. 13         | 0.91      | 9 vs. 10                      | 0.95      |                                                                                                 |
| SFG  | 23 vs. 11        | 0.00      | 12 vs. 8                      | 1.00      |                                                                                                 |

**Supplementary Table 2. Top AD target genes from AlzGene and AlzBase** Top “known AD target genes” were selected by frequency of appearance from the databases: from AlzGene top-106 genes with frequency >7, and from AlzBase top-109 genes with >15. Complete lists of the 212 top known AD target genes may be accessed at the Figshare database link: [10.6084/m9.figshare.8952938](https://doi.org/10.6084/m9.figshare.8952938)

| Database                                                                                         | Type of genes collection | Gene set used for comparison | Top-5 target genes with highest appearance frequencies |
|--------------------------------------------------------------------------------------------------|--------------------------|------------------------------|--------------------------------------------------------|
| AlzGene<br>( <a href="https://www.alzforum.org/">https://www.alzforum.org/</a> )                 | GWAS                     | Top-106                      | <i>SORL1, APOE, ABCA1, IDE, GAB2</i>                   |
| AlzBase<br>( <a href="http://alz.big.ac.cn/alzBase/home">http://alz.big.ac.cn/alzBase/home</a> ) | DEG                      | Top-109                      | <i>NRN1, NCALD, ITPKB, RGS4, GADI, ATP6V1G2, NSF</i>   |



**Supplementary Table 3. Differentially co-expressed (DCE) gene pairs** A DCE gene pair has significant gain or loss in co-expression (GOC or LOC), test relative to control. The Q-statistics cut-off used to select the pairs corresponds to the top 0.1% of pairs in change of co-expression.

| Dataset | Total number of DCE pairs | Number of GOC/LOC pairs (% of all) |                | Q-statistics cut-off |
|---------|---------------------------|------------------------------------|----------------|----------------------|
|         |                           | GOC                                | LOC            |                      |
| AG      | 239,220                   | GOC                                | 151,108 (63.1) | 5.06                 |
|         |                           | LOC                                | 88,222 (36.9)  |                      |
| EC      | 238,704                   | GOC                                | 83,091 (34.8)  | 5.86                 |
|         |                           | LOC                                | 155,613 (65.2) |                      |
| HC      | 237,600                   | GOC                                | 149,576 (62.9) | 5.03                 |
|         |                           | LOC                                | 88,023 (37.1)  |                      |
| MTG     | 239,408                   | GOC                                | 133,800 (55.9) | 4.67                 |
|         |                           | LOC                                | 105,608 (44.1) |                      |
| PC      | 236,919                   | GOC                                | 63,226 (26.7)  | 4.78                 |
|         |                           | LOC                                | 173,693 (73.3) |                      |
| SFG     | 239,346                   | GOC                                | 124,634 (52.1) | 4.24                 |
|         |                           | LOC                                | 114,712 (47.9) |                      |

**Supplementary Table 4. Statistics of curated AG and ALZ gene sets** DEGs (differentially expressed genes) were selected by LIMMA in R environment ( $|FC(\log_2)| > 1$  and FDR thresholds: for AG, 7.50E-04; EC, 4.0E-06; HC, 1.0e-05; MTG, 5.0e-06; PC, 1.0e-04; SFG, 1.25e-05); up (down)-regulated DEGs have  $t$ -score  $>$  ( $<$ ) 0. Gene pairs in an IGN (interacting gene network) had significant gain or loss in co-expression, or GOC or LOC, test relative to control, and known protein-protein interaction. Gene pairs in an xIGN (extended IGN), the same as IGN, but included pairs with interactions once removed, and were required to have minimum degree  $>2$  for AG and  $>3$  for the five ALZ cases. Complete lists of all curated gene sets may be accessed at the Figshare database link: [10.6084/m9.figshare.8952938](https://doi.org/10.6084/m9.figshare.8952938)

| Gene sets                                                  | AG          | EC          | HC          | MTG         | PC          | SFG         |
|------------------------------------------------------------|-------------|-------------|-------------|-------------|-------------|-------------|
| DEG                                                        |             |             |             |             |             |             |
| Number of genes                                            | 741         | 845         | 837         | 829         | 764         | 829         |
| No. of up-regulated genes<br>(number in bracket: % of all) | 226<br>(30) | 186<br>(22) | 132<br>(16) | 476<br>(57) | 125<br>(16) | 136<br>(16) |
| No. of down-regulated genes                                | 515<br>(70) | 659<br>(78) | 705<br>(82) | 353<br>(43) | 639<br>(84) | 693<br>(84) |
| IGN (degree $> 0$ )                                        |             |             |             |             |             |             |
| Number of genes                                            | 305         | 325         | 389         | 378         | 335         | 278         |
| Degree of highest-degree gene                              | 9           | 11          | 14          | 14          | 6           | 6           |
| Genes with GOC links                                       | 242<br>(79) | 109<br>(34) | 285<br>(73) | 245<br>(65) | 118<br>(35) | 164<br>(59) |
| Genes with LOC links                                       | 78<br>(26)  | 261<br>(80) | 165<br>(42) | 198<br>(52) | 235<br>(70) | 130<br>(47) |
| Both GOC & LOC links                                       | 15<br>(5)   | 45<br>(14)  | 61<br>(16)  | 65<br>(17)  | 18<br>(5)   | 16<br>(6)   |
| xIGN (AG, degree $>2$ ; AD, degree $> 3$ )                 |             |             |             |             |             |             |
| Number of genes                                            | 901         | 787         | 1,063       | 903         | 903         | 664         |
| Degree of highest-degree gene                              | 90          | 219         | 270         | 267         | 138         | 221         |
| Genes with GOC links                                       | 869<br>(96) | 654<br>(83) | 990<br>(93) | 813<br>(90) | 656<br>(73) | 641<br>(97) |
| Genes with LOC links                                       | 617<br>(68) | 772<br>(98) | 879<br>(83) | 838<br>(93) | 860<br>(95) | 602<br>(91) |
| Both GOC & LOC links                                       | 585<br>(64) | 639<br>(81) | 806<br>(76) | 748<br>(83) | 613<br>(68) | 579<br>(87) |

**Supplementary Table 5. Top-10 DEGs ranked by false discovery rate (FDR) Up(down)-regulated DEGs have  $t$ -score  $>(<)$  0. Symbols: #, gene common to two or more brain regions; +, gene is a known AD targets; \*, gene is in Alzheimer's disease pathway (KEGG: hsa05010); \$, gene in Proteasome (KEGG: hsa03050).**

| Datasets | DEG      | $t$ -score | FDR      | Datasets | DEG     | $t$ -score | FDR      |
|----------|----------|------------|----------|----------|---------|------------|----------|
| AG       | RAB3C    | -21.8      | 2.47E-11 | MTG      | BBX     | 18.6       | 8.21E-13 |
|          | MYT1L    | -20.5      | 4.09E-11 |          | KLC1    | 16.2       | 1.81E-11 |
|          | NREP     | -16.6      | 1.61E-09 |          | KTN1    | 16.1       | 2.02E-11 |
|          | RGS4     | -16.5      | 1.61E-09 |          | FAM120A | 15.8       | 3.13E-11 |
|          | LMO4     | -15.7      | 2.94E-09 |          | SEPP1   | 15.7       | 3.37E-11 |
|          | SYNJ1    | -15.5      | 3.18E-09 |          | RBMS3   | 14.6       | 1.61E-10 |
|          | PRKCB    | -15.0      | 5.13E-09 |          | LIFR    | 14.4       | 1.93E-10 |
|          | SERTM1   | -14.9      | 5.44E-09 |          | MSI2    | 14.4       | 1.93E-10 |
|          | ARPP21   | -14.8      | 5.76E-09 |          | STAG2   | 14.2       | 2.48E-10 |
|          | FAM126B  | -14.6      | 5.76E-09 |          | ACTB    | -13.8      | 4.27E-10 |
| EC       | MRPL41   | -23.2      | 6.13E-12 | PC       | *UQCRC2 | -14.4      | 4.37E-07 |
|          | TECR     | -17.5      | 6.40E-10 |          | **ATP5B | -12.5      | 8.80E-07 |
|          | SOBP     | -17.7      | 6.40E-10 |          | #GLRB   | -12.8      | 8.80E-07 |
|          | ALKBH6   | -17.3      | 6.50E-10 |          | VDAC3   | -12.5      | 8.80E-07 |
|          | CDK19    | 16.6       | 9.91E-10 |          | #CDC42  | -12.5      | 8.80E-07 |
|          | RUNDC3A  | -16.3      | 1.15E-09 |          | +RPL15  | -13.1      | 8.80E-07 |
|          | FLJ22184 | -15.9      | 1.50E-09 |          | \$PSMA5 | -12.1      | 1.02E-06 |
|          | MIB2     | -15.9      | 1.50E-09 |          | MDN1    | -12.1      | 1.02E-06 |
|          | BRSK2    | -15.5      | 1.93E-09 |          | SMYD3   | -12.1      | 1.02E-06 |
|          | MED25    | -15.3      | 1.96E-09 |          | SRP54   | -11.9      | 1.20E-06 |
| HC       | ZNF532   | -21.9      | 4.29E-11 | SFG      | IQCA1   | 15.8       | 2.40E-08 |
|          | RTN3     | -19.0      | 4.63E-10 |          | +SNAP25 | -15.1      | 2.99E-08 |
|          | SUPT16H  | -17.9      | 1.20E-09 |          | GUCY1B3 | -13.3      | 7.41E-08 |
|          | GGA3     | 17.8       | 1.33E-09 |          | #GLRB   | -13.2      | 7.41E-08 |
|          | ZHX1     | -17.5      | 1.61E-09 |          | SMURF2  | 13.4       | 7.41E-08 |
|          | SCN2B    | -17.1      | 2.35E-09 |          | DZIP3   | -13.4      | 7.41E-08 |
|          | OPA1     | -17.0      | 2.49E-09 |          | #CDC42  | -13.2      | 7.41E-08 |
|          | SMS      | -16.8      | 2.77E-09 |          | EMC3    | -13.3      | 7.41E-08 |
|          | CAMTA1   | -16.5      | 3.81E-09 |          | +PCSK1  | -13.0      | 8.20E-08 |
|          | COPG1    | -16.3      | 4.78E-09 |          | VTA1    | -12.9      | 8.20E-08 |

**Supplementary Table 6. Top genes in IGN ranked by degree** Top IGN genes with degree 6 or greater. Degree/rank of gene in xIGN given in 4<sup>th</sup> column. Symbols: #, gene common to three or more AD brain regions; +, gene common to two AD brain regions; \*, gene is common to AG and at least one AD brain region; \$, top-20 gene by degree in xIGN.

| Dataset | Genes                | Degree in IGN | Rank/degree in xIGN | Dataset              | Genes               | Degree in IGN | Rank/degree in xIGN |
|---------|----------------------|---------------|---------------------|----------------------|---------------------|---------------|---------------------|
| AG      | PSMD4 <sup>\$</sup>  | 9             | 3/87                | HC                   | RPL7                | 7             | 185/74              |
|         | PSMA3                | 7             | 143/20              |                      | PSMD8               | 7             | 54/147              |
|         | *PSMC2               | 7             | 24/52               |                      | CD19                | 6             | 798/6               |
|         | SSX2IP               | 6             | 136/21              |                      | #IGHG1              | 6             | 100/107             |
|         | PSMC5 <sup>\$</sup>  | 6             | 2/88                |                      | MDH1                | 6             | 31/166              |
|         | PSMD2 <sup>\$</sup>  | 6             | 6/78                |                      | PSMA6               | 6             | 72/130              |
|         | *PSMD6               | 6             | 50/42               |                      | PSMB7 <sup>\$</sup> | 6             | 3/240               |
| EC      | #YWHAZ               | 11            | 109/85              | *PSMC2               | 6                   | 57/142        |                     |
|         | PHF20                | 10            | 305/34              | +PSMC6               | 6                   | 33/165        |                     |
|         | #TUBB                | 7             | 305/34              | YWHAB                | 6                   | 37/160        |                     |
|         | +TUBA4A              | 7             | 113/83              | #TUBB                | 14                  | 75/143        |                     |
|         | CLTC <sup>\$</sup>   | 6             | 1/219               | NSF <sup>\$</sup>    | 10                  | 4/252         |                     |
|         | #IGHG1 <sup>\$</sup> | 6             | 12/179              | HSPA8                | 9                   | 135/108       |                     |
|         | PLA2G4F              | 6             | 111/84              | +YWHAG               | 8                   | 53/158        |                     |
|         | +YWHAG               | 6             | 76/107              | #YWHAZ <sup>\$</sup> | 8                   | 18/201        |                     |
|         | +ACTG1               | 6             | 113/83              | +TUBA4A              | 8                   | 44/167        |                     |
|         | +STXBP1              | 6             | 61/116              | TCP1                 | 7                   | 130/110       |                     |
|         | +PSMC6 <sup>\$</sup> | 6             | 6/188               | PPP3CA               | 7                   | 32/176        |                     |
|         | CCT8                 | 6             | 19/165              | CDC42                | 6                   | 102/127       |                     |
| HC      | #YWHAZ               | 14            | 42/154              | +STXBP1              | 6                   | 235/62        |                     |
|         | PSMA2                | 13            | 45/151              | TIAM1                | 6                   | 73/144        |                     |
|         | ACTB                 | 9             | 231/59              | TRIM36               | 6                   | 113/118       |                     |
|         | *PSMD6 <sup>\$</sup> | 9             | 17/178              | EEF2                 | 6                   | 74/61         |                     |
|         | #TUBB                | 8             | 106/105             | GAPDH                | 6                   | 53/70         |                     |
|         | CCT7 <sup>\$</sup>   | 7             | 4/237               | #IGHG1               | 6                   | 1/221         |                     |
|         | RPL17                | 7             | 62/140              |                      |                     |               |                     |

**Supplementary Table 7. Top-10 genes in xIGNs by degree** Top-10 xIGN genes ranked by degree. Degree/rank of gene in IGN given in 4<sup>th</sup> column. Symbols: #, gene common to three or more AD brain regions; +, gene common to two AD brain regions; \*, gene is common to AG and at least one of five AD brain regions; &, high-degree gene in IGN.

| Dataset | Genes     | Degree in xIGN | Rank/degree in IGN | Dataset | Genes     | Degree in xIGN | Rank/degree in IGN |
|---------|-----------|----------------|--------------------|---------|-----------|----------------|--------------------|
| AG      | *CCT7     | 90             | 22/2               | MTG     | MAP2K1    | 267            | 82/2               |
|         | PSMC5&    | 88             | 4/6                |         | +DYNC1I1  | 264            | 82/2               |
|         | PSMD4&    | 87             | 1/9                |         | NAP1L5    | 255            | 148/1              |
|         | COPS5     | 83             | 64/1               |         | NSF&      | 252            | 2/10               |
|         | VPS72     | 82             | 64/1               |         | +ATP6V1E1 | 249            | 52/3               |
|         | PSMD2&    | 78             | 4/6                |         | RCAN2     | 238            | 148/1              |
|         | SUMO1     | 77             | 22/2               |         | ATP6V1H   | 235            | 148/1              |
|         | RAF1      | 75             | 10/3               |         | +GABRG2   | 233            | 29/4               |
|         | IMMT      | 74             | 64/1               |         | MAP4      | 224            | 82/2               |
|         | PSMC6     | 71             | 9/4                |         | TRIM37    | 223            | 148/1              |
| EC      | CLTC&     | 219            | 5/6                | PC      | RNF11     | 138            | 3/5                |
|         | DCTN4     | 203            | 115/1              |         | CAMK2B    | 120            | 24/2               |
|         | WASL      | 203            | 26/4               |         | EEF1G     | 118            | 24/2               |
|         | UBE2N     | 196            | 64/2               |         | PI4KA     | 113            | 66/1               |
|         | +DYNC1I1  | 193            | 115/1              |         | AP2M1     | 112            | 24/2               |
|         | PSMC6&    | 188            | 5/6                |         | P4HB      | 112            | 66/1               |
|         | +RAB6A    | 188            | 115/1              |         | ATP2A2    | 111            | 66/1               |
|         | +ATP6V1E1 | 186            | 37/3               |         | CLTB      | 109            | 66/1               |
|         | HECTD1    | 185            | 115/1              |         | RABAC1    | 108            | 66/1               |
|         | PSMC2     | 184            | 13/5               |         | +SCOC     | 108            | 24/2               |
| HC      | DDX1      | 270            | 73/2               | SFG     | IGHG1&    | 221            | 1/6                |
|         | NECAP1    | 254            | 46/3               |         | EPS16     | 134            | 13/2               |
|         | PSMB7&    | 240            | 10/6               |         | PRKX      | 117            | 44/1               |
|         | *CCT7&    | 237            | 6/7                |         | USP32     | 109            | 44/1               |
|         | DSTN      | 226            | 46/3               |         | ATP5A1    | 107            | 44/1               |
|         | CCT8      | 225            | 73/2               |         | KPNB1     | 101            | 44/1               |
|         | +RAB6A    | 211            | 134/1              |         | SEC24C    | 97             | 44/1               |
|         | TOPBP1    | 205            | 134/1              |         | H2AFZ     | 85             | 44/1               |
|         | +SCOC     | 198            | 134/1              |         | PRKY      | 84             | 44/1               |
|         | ATP5C1    | 195            | 33/4               |         | +GABRG2   | 77             | 4/3                |

**Supplementary Table 8. Enrichment of known AD target genes in curated AG and ALZ gene sets** Enrichments of top AlzGene and AlzBase gene sets are shown as number of hits and, in brackets, Fisher's exact test *p*-value. Sizes of curated gene sets are given in Supplementary Table 4. GOC, gain of co-expression; LOC, loss of co-expression. Complete list of known target genes enriched in curated gene sets may be accessed at the Figshare database link:

[10.6084/m9.figshare.8952938](https://www.figshare.com/figure/8952938)

| Gene sets                                                         | AG              | EC              | HC              | MTG             | PC              | SFG             |
|-------------------------------------------------------------------|-----------------|-----------------|-----------------|-----------------|-----------------|-----------------|
| Enrichment in DEG sets                                            |                 |                 |                 |                 |                 |                 |
| Top-106 AlzGene target genes<br>No. of hits<br>( <i>p</i> -value) | 7<br>(7.0E-02)  | 9<br>(2.2E-02)  | 3<br>(7.8E-01)  | 2<br>(9.2E-01)  | 5<br>(3.2E-01)  | 3<br>(7.7E-01)  |
| Rank of highest ranking gene                                      | 49              | 160             | 358             | 40              | 23              | 674             |
| Up-/down-regulated                                                | 4/3             | 3/6             | 0/3             | 1/1             | 1/4             | 1/2             |
| Top-109 AlzBase target genes<br>No. of hits<br>( <i>p</i> -value) | 63<br>(7.5E-64) | 11<br>(3.4E-03) | 23<br>(2.1E-11) | 42<br>(2.3E-31) | 28<br>(6.3E-17) | 52<br>(1.9E-44) |
| Rank of highest ranking gene                                      | 3               | 92              | 51              | 52              | 2               | 2               |
| Up-/down-regulated                                                | 11/52           | 6/5             | 0/23            | 11/31           | 0/28            | 6/46            |
| Enrichment in IGN sets                                            |                 |                 |                 |                 |                 |                 |
| Top-106 AlzGene target genes<br>No. of hits<br>( <i>p</i> -value) | 9<br>(1.9E-05)  | 3<br>(2.1E-01)  | 3<br>(3.0E-01)  | 3<br>(2.8E-01)  | 7<br>(1.3E-03)  | 7<br>(4.4E-04)  |
| Rank of highest ranking gene                                      | 10              | 13              | 19              | 13              | 1               | 44              |
| Genes with GOC/LOC/both links                                     | 7/4/2           | 1/2/0           | 1/3/1           | 2/2/1           | 3/4/0           | 3/4/0           |
| Top-109 AlzBase target genes<br>No. of hits<br>( <i>p</i> -value) | 9<br>(2.4E-05)  | 19<br>(3.0E-15) | 19<br>(7.7E-14) | 28<br>(4.6E-25) | 12<br>(1.2E-07) | 13<br>(1.5E-09) |
| Rank of highest ranking gene                                      | 10              | 26              | 11              | 2               | 24              | 2               |
| Genes with GOC/LOC/both links                                     | 8/1/0           | 4/17/2          | 16/6/3          | 21/13/6         | 6/7/1           | 6/7/0           |
| Enrichment in xIGN sets                                           |                 |                 |                 |                 |                 |                 |
| Top-106 AlzGene target genes<br>No. of hits<br>( <i>p</i> -value) | 12<br>(1.5E-03) | 5<br>(3.4E-01)  | 7<br>(2.6E-01)  | 8<br>(7.4E-02)  | 9<br>(3.2E-02)  | 10<br>(1.5E-03) |
| Rank of highest ranking gene                                      | 38              | 51              | 57              | 52              | 13              | 18              |
| Genes with GOC/LOC/both links                                     | 10/10/8         | 5/4/4           | 6/7/6           | 7/7/6           | 8/9/8           | 10/9/9          |
| Top-109 AlzBase target genes<br>No. of hits<br>( <i>p</i> -value) | 17<br>(2.4E-06) | 29<br>(1.4E-17) | 29<br>(3.5E-14) | 38<br>(2.9E-25) | 25<br>(2.1E-12) | 23<br>(1.9E-13) |
| Rank of highest ranking gene                                      | 60              | 5               | 2               | 2               | 16              | 10              |
| Genes with GOC/LOC/both links                                     | 17/4/13         | 28/29/28        | 28/25/24        | 38/37/37        | 22/20/17        | 22/19/18        |

**Supplementary Table 9. DCE partners of five culprit genes** A DCE partner a culprit gene is included if the magnitude in the change in linear regression coefficient,  $|\Delta r|$ , of the gene-pair is greater than 1.5, and if the pair passes the Q-statistic cutoff (see Supplementary Table 3). These are not necessarily IDCE partners, or genes in the appropriate IGN, and most are not. Culprit gene symbols stand for: *APP*, amyloid precursor protein; *MAPT*, tau protein; *APOE*, apolipoprotein E; *PSEN1*, presenilin-1; *PSEN2*, presenilin-2.

| Dataset | Culprit gene | GOC and LOC partners                                                                                                                                                                                                                                                                                                                                                                                                                                                                                                                                                                                                                                         |
|---------|--------------|--------------------------------------------------------------------------------------------------------------------------------------------------------------------------------------------------------------------------------------------------------------------------------------------------------------------------------------------------------------------------------------------------------------------------------------------------------------------------------------------------------------------------------------------------------------------------------------------------------------------------------------------------------------|
| HC      | APP          | <b>GOC</b> – KDM2A (1.85), DDHD1 (1.80)                                                                                                                                                                                                                                                                                                                                                                                                                                                                                                                                                                                                                      |
|         | MAPT         | <b>GOC</b> – GABRA1 (1.87), CDH18 (1.84), GABRD (1.70)                                                                                                                                                                                                                                                                                                                                                                                                                                                                                                                                                                                                       |
|         | APOE         | <b>GOC</b> – BAK1 (1.88)<br><b>LOC</b> – PUM1 (-1.81), DR1 (-1.81)                                                                                                                                                                                                                                                                                                                                                                                                                                                                                                                                                                                           |
|         | PSEN2        | <b>GOC</b> – POLR2H (1.80), ZWILCH (1.64), C1orf115 (1.56), SORBS2 (1.52)<br><b>LOC</b> – ZNF606 (-1.86), NRP2 (-1.65)                                                                                                                                                                                                                                                                                                                                                                                                                                                                                                                                       |
| MTG     | APP          | <b>GOC</b> – PDE2A (1.57), OGDHL (1.52)<br><b>LOC</b> – KRAS (-1.65), ZBTB39 (-1.52)                                                                                                                                                                                                                                                                                                                                                                                                                                                                                                                                                                         |
| PC      | MAPT         | <b>LOC</b> – LDB3 (-1.75), ST6GALNAC1 (-1.62), AIP (-1.54)                                                                                                                                                                                                                                                                                                                                                                                                                                                                                                                                                                                                   |
| SFG     | APP          | <b>GOC</b> – SETD5 (1.73), CDK5RAP3 (1.73), TYK2 (1.72), EIF2B4 (1.65), PRPF8 (1.50)<br><b>LOC</b> – CLNK (-1.75), UCKL1 (-1.72), VENTXP1 (-1.67), BPIFA3 (-1.63), ARL2BP (-1.51)                                                                                                                                                                                                                                                                                                                                                                                                                                                                            |
|         | APOE         | <b>GOC</b> – NFU1 (1.86), SEC61G (1.79), ASAH1 (1.75), G2E3 (1.73), SH3BGRL (1.72), PAPD4 (1.69), MIR22 (1.63), MIR22HG (1.63), TMEM177 (1.60), NDUFB6 (1.57), BHLHE40 (1.54), LACTB2 (1.54), TMEM14B (1.53), TMEM14C(1.53), SPAG9(1.51)<br><b>LOC</b> – MROH6 (-1.76), INSC (-1.75), BTBD8 (-1.75), CYMP (-1.74), C1orf180 (-1.71), FLJ20518 (-1.70), C6orf118 (-1.56), ARMCX6 (-1.56), ADAMTS21 (-1.56)                                                                                                                                                                                                                                                    |
|         | PSEN1        | <b>LOC</b> – CEBPA (-1.63), RHOD (-1.55)                                                                                                                                                                                                                                                                                                                                                                                                                                                                                                                                                                                                                     |
|         | MAPT         | <b>GOC</b> – PCDH7 (1.80), BRI3BP (1.80), ZC3H15 (1.78), EPHA4 (1.76), FAM3C (1.76), AKAP11 (1.76), MAPK9 (1.75), ENOPH1 (1.75), CAMTA1 (1.73), H2AFZ (1.73), SEC62 (1.73), MYO5A (1.72), SLC16A14 (1.71), PPP3CA (1.71), MRPL15 (1.71), MGAT5 (1.71), SACS (1.67), BID (1.67), PNMAL1 (1.67), KLHL7 (1.64), USP32 (1.63), CDR2 (1.62), C1QTNF4 (1.60), KIAA1244 (1.60), ZFAND2A (1.60), TDP2 (1.58), ITCH (1.56), SMIM19 (1.55), ARHGAP32 (1.50)<br><b>LOC</b> – HDAC6 (-1.76), LDLRAD4-AS1 (-1.72), LIMS2 (-1.72), NKX6-2 (-1.71), BCAR4 (-1.71), PIP4K2B (-1.70), ADRA1A (-1.70), HK3 (-1.70), SLC1A5 (-1.66), SUSD2 (-1.65), RASSF6 (-1.58), B2M (-1.55) |

**Supplementary Table 10. Culprit genes in curated AG and ALZ gene sets** For IGN and xIGN number given is degree, and for DEG, *t*-score. Number in bracket is gene rank, by degree in IGN and xIGN, and by *t*-score in DEG. Up(down)-regulated DEGs have *t*-score >( <) 0. Culprit gene symbols stand for: *APP*, amyloid precursor protein; *MAPT*, tau protein; *APOE*, apolipoprotein E; *PSEN1*, presenilin-1; *PSEN2*, presenilin-2. Bars indicate genes do not appear in gene set.

| IGN          |                   |                   |                    |                    |                   |                    |
|--------------|-------------------|-------------------|--------------------|--------------------|-------------------|--------------------|
| Culprit gene | AG<br>(305 genes) | EC<br>(325 genes) | HC<br>(389 genes)  | MTG<br>(378 genes) | PC<br>(335 genes) | SFG<br>(278 genes) |
| APP          | –                 | –                 | –                  | –                  | –                 | –                  |
| MAPT         | 1 (44)            | –                 | –                  | –                  | –                 | –                  |
| APOE         | 2 (64)            | –                 | –                  | –                  | –                 | 1(44)              |
| PSEN1        | –                 | –                 | –                  | –                  | –                 | –                  |
| PSEN2        | –                 | –                 | –                  | –                  | –                 | –                  |
| xIGN         |                   |                   |                    |                    |                   |                    |
| Culprit gene | AG<br>(901 genes) | EC<br>(787 genes) | HC<br>(1063 genes) | MTG<br>(903 genes) | PC<br>(903 genes) | SFG<br>(664 genes) |
| APP          | –                 | –                 | –                  | 14 (555)           | –                 | 10 (245)           |
| MAPT         | 19 (149)          | –                 | –                  | –                  | 11 (478)          | 9 (270)            |
| APOE         | 16 (175)          | –                 | –                  | –                  | –                 | 11 (213)           |
| PSEN1        | –                 | –                 | –                  | –                  | –                 | –                  |
| PSEN2        | –                 | –                 | 25 (422)           | –                  | –                 | –                  |
| DEGs         |                   |                   |                    |                    |                   |                    |
| Culprit gene | AG<br>(741 genes) | EC<br>(845 genes) | HC<br>(837 genes)  | MTG<br>(829 genes) | PC<br>(764 genes) | SFG<br>(829 genes) |
| APP          | –                 | –                 | –                  | –                  | –                 | –                  |
| MAPT         | –                 | –                 | –                  | –                  | –                 | –                  |
| APOE         | –                 | –                 | –                  | –                  | –                 | –                  |
| PSEN1        | –                 | –                 | –                  | –                  | -6.96 (612)       | –                  |
| PSEN2        | –                 | –                 | –                  | -8.20 (444)        | –                 | –                  |



**Supplementary Table 11. KEGG enrichment in curated AG and ALZ gene sets** Number of KEGG pathways enriched (DAVID v 6.7, Fisher's exact test  $p < 0.05$ ) in curated DEG, IGN, and xIGN gene sets; number of genes in each curated set is given in brackets.

| Number of enriched KEGG pathways | AG                | EC                | HC                 | MTG               | PC                | SFG               |
|----------------------------------|-------------------|-------------------|--------------------|-------------------|-------------------|-------------------|
| DEG                              | 30<br>(741 genes) | 4<br>(845 genes)  | 18<br>(837 genes)  | 18<br>(829 genes) | 10<br>(764 genes) | 13<br>(829 genes) |
| IGN                              | 34<br>(305 genes) | 13<br>(325 genes) | 18<br>(389 genes)  | 25<br>(378 genes) | 25<br>(335 genes) | 28<br>(278 genes) |
| xIGN                             | 32<br>(901 genes) | 18<br>(787 genes) | 21<br>(1063 genes) | 33<br>(903 genes) | 44<br>(903 genes) | 35<br>(664 genes) |

**Supplementary Table 12. Top-10 KEGG pathways enriched in DEG** Top-10 KEGG pathways enriched in DEG sets (DAVID v 6.7, Fisher's exact test  $p < 0.05$ ). Asterisks mark KEGG pathways that are also top-10 in same-case IGN and/or xIGN sets.

| Da-tasets | KEGG pathway                                                        | <i>p</i> -value                    | Da-tasets | KEGG pathway                                                        | <i>p</i> -value |
|-----------|---------------------------------------------------------------------|------------------------------------|-----------|---------------------------------------------------------------------|-----------------|
| AG        | hsa04010:MAPK signaling pathway                                     | 7.38E-07                           | MTG       | hsa05120:Epithelial cell signaling in Helicobacter pylori infection | 1.19E-04        |
|           | hsa04514:Cell adhesion molecules (CAMs)                             | 6.28E-06                           |           | hsa00190:Oxidative phosphorylation                                  | 2.41E-04        |
|           | hsa05120:Epithelial cell signaling in Helicobacter pylori infection | 1.07E-04                           |           | hsa05110:Vibrio cholerae infection                                  | 4.00E-04        |
|           | hsa04020:Calcium signaling pathway                                  | 1.45E-04                           |           | hsa04520:Adherens junction                                          | 1.47E-03        |
|           | hsa04720:Long-term potentiation                                     | 4.56E-04                           |           | hsa05412:Arrhythmogenic right ventricular cardiomyopathy (ARVC)     | 4.42E-03        |
|           | hsa05020:Prion diseases                                             | 1.41E-03                           |           | hsa05130:Pathogenic Escherichia coli infection                      | 7.15E-03        |
|           | hsa04730:Long-term depression                                       | 1.97E-03                           |           | hsa05211:Renal cell carcinoma                                       | 7.92E-03        |
|           | hsa04114:Oocyte meiosis                                             | 2.95E-03                           |           | hsa04330:Notch signaling pathway                                    | 8.43E-03        |
|           | hsa04070:Phosphatidylinositol signaling system                      | 3.34E-03                           |           | hsa04810:Regulation of actin cytoskeleton                           | 1.13E-02        |
|           | hsa05322:Systemic lupus erythematosus                               | 3.43E-03                           |           | hsa04510:Focal adhesion                                             | 1.18E-02        |
| EC        | hsa00030:Pentose phosphate pathway                                  | 5.17E-04                           | PC        | hsa05012:Parkinson's disease                                        | 2.18E-23        |
|           | hsa00051:Fructose and mannose metabolism                            | 2.84E-03                           |           | hsa00190:Oxidative phosphorylation                                  | 3.82E-21        |
|           | hsa04666:Fc gamma R-mediated phagocytosis                           | 7.08E-03                           |           | hsa05016:Huntington's disease                                       | 7.54E-18        |
|           | *hsa05016:Huntington's disease                                      | 2.16E-02                           |           | hsa05010:Alzheimer's disease                                        | 1.79E-15        |
|           | —                                                                   | —                                  |           | *hsa03050:Proteasome                                                | 1.94E-09        |
|           |                                                                     |                                    |           | *hsa05130:Pathogenic Escherichia coli infection                     | 1.08E-03        |
|           |                                                                     |                                    |           | hsa00620:Pyruvate metabolism                                        | 6.09E-03        |
|           |                                                                     |                                    |           | hsa04260:Cardiac muscle contraction                                 | 1.11E-02        |
|           |                                                                     | *hsa03040:Spliceosome              | 2.33E-02  |                                                                     |                 |
|           |                                                                     | hsa00020:Citrate cycle (TCA cycle) | 2.73E-02  |                                                                     |                 |
| HC        | *hsa05016:Huntington's disease                                      | 3.46E-13                           | SFG       | hsa00190:Oxidative phosphorylation                                  | 6.46E-13        |
|           | *hsa05012:Parkinson's disease                                       | 7.77E-12                           |           | hsa05012:Parkinson's disease                                        | 1.17E-06        |
|           | *hsa00190:Oxidative phosphorylation                                 | 8.08E-09                           |           | hsa05016:Huntington's disease                                       | 2.71E-06        |
|           | *hsa03050:Proteasome                                                | 1.82E-08                           |           | hsa00020:Citrate cycle (TCA cycle)                                  | 1.37E-05        |
|           | *hsa05010:Alzheimer's disease                                       | 6.97E-08                           |           | hsa03050:Proteasome                                                 | 1.47E-05        |
|           | hsa00620:Pyruvate metabolism                                        | 2.89E-04                           |           | hsa05120:Epithelial cell signaling in Helicobacter pylori infection | 2.57E-05        |
|           | hsa00970:Aminoacyl-tRNA biosynthesis                                | 3.53E-04                           |           | hsa05010:Alzheimer's disease                                        | 5.59E-05        |
|           | hsa00020:Citrate cycle (TCA cycle)                                  | 1.35E-03                           |           | hsa05110:Vibrio cholerae infection                                  | 4.00E-04        |
|           | hsa00290:Valine, leucine and isoleucine biosynthesis                | 2.36E-03                           |           | hsa00620:Pyruvate metabolism                                        | 3.37E-03        |
|           | hsa05110:Vibrio cholerae infection                                  | 3.63E-03                           |           | *hsa05130:Pathogenic Escherichia coli infection                     | 7.15E-03        |

**Supplementary Table 13. Top-10 KEGG pathways enriched in IGN** Top-10 KEGG pathways enriched in IGN sets (DAVID v 6.7, Fisher's exact test  $P < 0.05$ ). Asterisks/#'s mark KEGG pathways that are also top-10 in same-case DEG/xIGN sets.

| Data sets                     | KEGG pathway                                    | <i>p</i> -value            | Data sets | KEGG pathway                                    | <i>p</i> -value |
|-------------------------------|-------------------------------------------------|----------------------------|-----------|-------------------------------------------------|-----------------|
| AG                            | #hsa03050:Proteasome                            | 2.44E-16                   | MTG       | #hsa03050:Proteasome                            | 8.47E-09        |
|                               | #hsa05200:Pathways in cancer                    | 9.26E-06                   |           | hsa05130:Pathogenic Escherichia coli infection  | 6.08E-06        |
|                               | hsa05213:Endometrial cancer                     | 1.75E-05                   |           | #hsa04666:Fc gamma R-mediated phagocytosis      | 4.33E-05        |
|                               | *hsa05010:Alzheimer's disease                   | 2.13E-05                   |           | #hsa03010:Ribosome                              | 7.93E-05        |
|                               | #hsa05130:Pathogenic Escherichia coli infection | 3.76E-05                   |           | #hsa04144:Endocytosis                           | 4.52E-04        |
|                               | hsa05215:Prostate cancer                        | 5.47E-05                   |           | #hsa04114:Oocyte meiosis                        | 7.41E-04        |
|                               | #hsa05220:Chronic myeloid leukemia              | 6.25E-05                   |           | hsa04012:ErbB signaling pathway                 | 1.37E-03        |
|                               | hsa05210:Colorectal cancer                      | 1.66E-04                   |           | hsa04660:T cell receptor signaling pathway      | 2.15E-03        |
|                               | #hsa04012:ErbB signaling pathway                | 2.22E-04                   |           | hsa04722:Neurotrophin signaling pathway         | 6.28E-03        |
|                               | *#hsa05016:Huntington's disease                 | 2.54E-04                   |           | hsa04110:Cell cycle                             | 6.67E-03        |
| EC                            | #hsa03050:Proteasome                            | 3.33E-11                   | PC        | *#hsa03050:Proteasome                           | 3.04E-08        |
|                               | #hsa04114:Oocyte meiosis                        | 8.68E-05                   |           | #hsa03040:Spliceosome                           | 9.13E-07        |
|                               | hsa03010:Ribosome                               | 2.22E-04                   |           | #hsa03010:Ribosome                              | 1.02E-06        |
|                               | #hsa04120:Ubiquitin mediated proteolysis        | 6.88E-04                   |           | #hsa05215:Prostate cancer                       | 7.67E-06        |
|                               | #hsa05130:Pathogenic Escherichia coli infection | 1.34E-03                   |           | #hsa04144:Endocytosis                           | 4.35E-05        |
|                               | #hsa04540:Gap junction                          | 4.63E-03                   |           | #hsa04110:Cell cycle                            | 7.44E-05        |
|                               | hsa04730:Long-term depression                   | 1.60E-02                   |           | hsa05214:Glioma                                 | 2.41E-04        |
|                               | *#hsa05016:Huntington's disease                 | 1.74E-02                   |           | hsa05200:Pathways in cancer                     | 1.53E-03        |
|                               | hsa05014:Amyotrophic lateral sclerosis (ALS)    | 1.97E-02                   |           | *hsa05130:Pathogenic Escherichia coli infection | 2.93E-03        |
| #hsa04110:Cell cycle          | 3.16E-02                                        | hsa04520:Adherens junction | 4.33E-03  |                                                 |                 |
| HC                            | *#hsa03050:Proteasome                           | 2.01E-18                   | SFG       | #hsa04114:Oocyte meiosis                        | 8.04E-06        |
|                               | #hsa03010:Ribosome                              | 1.42E-08                   |           | hsa04660:T cell receptor signaling pathway      | 3.43E-05        |
|                               | *hsa05016:Huntington's disease                  | 3.65E-05                   |           | #hsa05200:Pathways in cancer                    | 7.34E-05        |
|                               | hsa04114:Oocyte meiosis                         | 5.31E-05                   |           | hsa03010:Ribosome                               | 1.19E-04        |
|                               | #hsa05130:Pathogenic Escherichia coli infection | 2.32E-04                   |           | #hsa04722:Neurotrophin signaling pathway        | 5.49E-04        |
|                               | *hsa05012:Parkinson's disease                   | 2.77E-04                   |           | hsa04110:Cell cycle                             | 5.88E-04        |
|                               | *#hsa00190:Oxidative phosphorylation            | 1.08E-03                   |           | #hsa04360:Axon guidance                         | 7.68E-04        |
|                               | hsa04722:Neurotrophin signaling pathway         | 2.22E-03                   |           | *hsa05130:Pathogenic Escherichia coli infection | 8.63E-04        |
|                               | #hsa00010:Glycolysis / Gluconeogenesis          | 6.76E-03                   |           | hsa04662:B cell receptor signaling pathway      | 9.61E-04        |
| *hsa05010:Alzheimer's disease | 7.86E-03                                        | hsa04510:Focal adhesion    | 1.15E-03  |                                                 |                 |

**Supplementary Table 14. Top-10 KEGG enriched in xIGN** Top-10 KEGG pathways enriched in xIGN sets (DAVID v 6.7, Fisher's exact test  $P < 0.05$ ). Asterisks/#'s mark KEGG pathways that are also top-10 in same-case DEG/IGN sets.

| Data sets                               | KEGG pathway                                    | <i>p</i> -value                                  | Data sets | KEGG pathway                                 | <i>p</i> -value |
|-----------------------------------------|-------------------------------------------------|--------------------------------------------------|-----------|----------------------------------------------|-----------------|
| AG                                      | #hsa03050:Proteasome                            | 6.39E-15                                         | MTG       | #hsa03050:Proteasome                         | 6.88E-13        |
|                                         | hsa03040:Spliceosome                            | 7.71E-09                                         |           | hsa04120:Ubiquitin mediated proteolysis      | 1.77E-06        |
|                                         | #hsa05220:Chronic myeloid leukemia              | 3.08E-06                                         |           | #hsa04144:Endocytosis                        | 4.51E-06        |
|                                         | *#hsa05016:Huntington's disease                 | 5.44E-05                                         |           | *hsa05010:Alzheimer's disease                | 5.51E-05        |
|                                         | hsa03010:Ribosome                               | 1.00E-04                                         |           | #hsa03010:Ribosome                           | 1.09E-04        |
|                                         | *hsa05010:Alzheimer's disease                   | 1.73E-04                                         |           | *hsa05016:Huntington's disease               | 1.34E-04        |
|                                         | #hsa05200:Pathways in cancer                    | 2.00E-04                                         |           | hsa05014:Amyotrophic lateral sclerosis (ALS) | 1.66E-04        |
|                                         | #hsa05130:Pathogenic Escherichia coli infection | 5.19E-04                                         |           | #hsa04114:Oocyte meiosis                     | 2.96E-04        |
|                                         | hsa05014:Amyotrophic lateral sclerosis (ALS)    | 1.00E-03                                         |           | hsa05012:Parkinson's disease                 | 3.44E-04        |
| #hsa04012:ErbB signaling pathway        | 0.00103                                         | #hsa04666:Fc gamma R-mediated phagocytosis       | 3.50E-04  |                                              |                 |
| EC                                      | #hsa03050:Proteasome                            | 8.15E-18                                         | PC        | *#hsa03050:Proteasome                        | 1.47E-09        |
|                                         | #hsa04120:Ubiquitin mediated proteolysis        | 1.11E-05                                         |           | #hsa03040:Spliceosome                        | 8.26E-07        |
|                                         | #hsa04114:Oocyte meiosis                        | 3.50E-05                                         |           | hsa04120:Ubiquitin mediated proteolysis      | 1.32E-06        |
|                                         | #hsa04110:Cell cycle                            | 2.23E-04                                         |           | #hsa03010:Ribosome                           | 2.76E-06        |
|                                         | #hsa04540:Gap junction                          | 2.44E-04                                         |           | hsa04012:ErbB signaling pathway              | 2.76E-06        |
|                                         | hsa03040:Spliceosome                            | 2.49E-04                                         |           | hsa04910:Insulin signaling pathway           | 1.05E-05        |
|                                         | #hsa05130:Pathogenic Escherichia coli infection | 3.25E-04                                         |           | #hsa04144:Endocytosis                        | 1.95E-05        |
|                                         | hsa04144:Endocytosis                            | 5.30E-04                                         |           | #hsa05215:Prostate cancer                    | 5.58E-05        |
|                                         | *#hsa05016:Huntington's disease                 | 8.98E-04                                         |           | #hsa04110:Cell cycle                         | 8.05E-05        |
| hsa04722:Neurotrophin signaling pathway | 1.48E-03                                        | hsa04914:Progesterone-mediated oocyte maturation | 1.21E-04  |                                              |                 |
| HC                                      | *#hsa03050:Proteasome                           | 2.80E-15                                         | SFG       | hsa04666:Fc gamma R-mediated phagocytosis    | 1.67E-04        |
|                                         | *#hsa05016:Huntington's disease                 | 2.73E-09                                         |           | #hsa04360:Axon guidance                      | 1.94E-04        |
|                                         | *#hsa05012:Parkinson's disease                  | 5.79E-08                                         |           | #hsa04722:Neurotrophin signaling pathway     | 3.62E-04        |
|                                         | #hsa03010:Ribosome                              | 5.92E-07                                         |           | hsa05220:Chronic myeloid leukemia            | 6.62E-04        |
|                                         | hsa04120:Ubiquitin mediated proteolysis         | 3.16E-06                                         |           | hsa04012:ErbB signaling pathway              | 7.82E-04        |
|                                         | *#hsa00190:Oxidative phosphorylation            | 1.01E-05                                         |           | #hsa05200:Pathways in cancer                 | 8.29E-04        |
|                                         | #hsa00010:Glycolysis / Gluconeogenesis          | 1.12E-04                                         |           | #hsa04114:Oocyte meiosis                     | 8.47E-04        |
|                                         | hsa03040:Spliceosome                            | 1.36E-04                                         |           | hsa05215:Prostate cancer                     | 9.74E-04        |
|                                         | #hsa05130:Pathogenic Escherichia coli infection | 2.32E-04                                         |           | hsa04540:Gap junction                        | 9.74E-04        |
| *#hsa05010:Alzheimer's disease          | 2.47E-04                                        | hsa04062:Chemokine signaling pathway             | 1.18E-03  |                                              |                 |

**Supplementary Table 15.1. Hits of KEGG pathway Pathogen *E. coli*. infection in six cases**

| Gene symbol                         | DEG ( <i>t</i> -score, rank) |                   |                   |                    |                   |                    |
|-------------------------------------|------------------------------|-------------------|-------------------|--------------------|-------------------|--------------------|
|                                     | AG<br>(741 genes)            | EC<br>(845 genes) | HC<br>(837 genes) | MTG<br>(829 genes) | PC<br>(764 genes) | SFG<br>(829 genes) |
| ACTB                                | -                            | -                 | -8.71, 119        | -13.82, 10         | -                 | -                  |
| ACTG1                               | -                            | -                 | -                 | -                  | -                 | -                  |
| ARPC3                               | -                            | -                 | -                 | -                  | -6.92, 633        | -                  |
| ARPC5L                              | -                            | -                 | -9.37, 356        | -                  | -                 | -                  |
| ARPC1A                              | -                            | -                 | -12.55, 53        | -                  | -6.82, 673        | -7.54, 767         |
| ARHGEF2                             | -                            | -                 | -                 | -                  | 7.76, 339         | -                  |
| CD14                                | 5.34, 721                    | -                 | -                 | -                  | -                 | -                  |
| CDC42                               | -10.19, 98                   | -                 | -12.74, 44        | -                  | -12.47, 2         | -13.19, 3          |
| CDH1                                | -                            | -                 | -                 | -                  | -                 | -                  |
| CTTN                                | -                            | -                 | -                 | 7.30, 803          | -                 | -                  |
| EZR                                 | 5.31, 725                    | -                 | -                 | 11.14, 53          | -                 | 9.61, 174          |
| FYN                                 | -                            | -                 | -                 | -                  | -                 | -                  |
| HCLS1                               | 6.77, 486                    | -                 | -                 | -                  | -                 | -                  |
| KRT18                               | -                            | -                 | -                 | -                  | -                 | -                  |
| LY96                                | 7.12, 424                    | -                 | -                 | -                  | -                 | -                  |
| ITGB1                               | 5.78, 641                    | -                 | -                 | 9.71, 162          | -                 | -                  |
| NCK1                                | -                            | -                 | -                 | -                  | -                 | -                  |
| NCL                                 | -                            | -                 | -                 | -                  | -                 | -                  |
| TUBA1B                              | -                            | -                 | -9.16, 418        | -8.03, 500         | -7.53, 405        | -7.54, 769         |
| TUBA1C                              | -                            | -                 | -9.08, 436        | -8.05, 487         | -7.81, 324        | -                  |
| TUBA3C                              | -                            | -                 | -                 | -10.09, 126        | -7.49, 411        | -                  |
| TUBA4A                              | -6.69, 497                   | -                 | -                 | -                  | -                 | -9.40, 205         |
| TUBB                                | -                            | -                 | -12.66, 77        | -                  | -7.24, 491        | -9.91, 136         |
| TUBB3                               | -                            | -                 | -                 | -8.67, 308         | -6.94, 621        | -7.71, 679         |
| TUBB6                               | 5.96, 607                    | -                 | -                 | -                  | -                 | -                  |
| RHOA                                | -                            | -                 | -                 | -                  | -6.93, 627        | -                  |
| ROCK2                               | -                            | -                 | -                 | -                  | -                 | -                  |
| WAS                                 | -                            | -                 | -                 | -                  | -                 | -                  |
| WASL                                | -                            | -                 | -                 | -                  | -                 | -9.58, 176         |
| YWHAQ                               | -                            | -                 | -                 | -                  | -                 | -                  |
| YWHAZ                               | -13.10, 30                   | -                 | -8.48, 656        | -7.58, 673         | -8.52, 181        | -7.54, 769         |
| Fisher's exact test <i>p</i> -value | 6.67E-03                     | -                 | 3.92E-02          | 7.15E-03           | 1.08E-03          | 7.15E-03           |

**Supplementary Table 15.2. Hits of KEGG pathway OXPHOS in six cases**

| Gene symbol | DEG ( <i>t</i> -score, rank) |                   |                   |                    |                   |                    |
|-------------|------------------------------|-------------------|-------------------|--------------------|-------------------|--------------------|
|             | AG<br>(741 genes)            | EC<br>(845 genes) | HC<br>(837 genes) | MTG<br>(829 genes) | PC<br>(764 genes) | SFG<br>(829 genes) |
| ATP5A1      | -                            | -                 | -8.71, 562        | -                  | -10.06, 49        | -                  |
| ATP5B       | -                            | -                 | -9.64, 303        | -                  | -12.47, 2         | -7.83, 632         |
| ATP5C1      | -                            | -                 | -                 | -8.77, 279         | -10.20, 42        | -7.91, 592         |
| ATP5F1      | -                            | -                 | -                 | -                  | -6.81, 678        | -                  |
| ATP5G1      | -                            | -10.18, 294       | -                 | -9.94, 138         | -                 | -10.70, 71         |
| ATP5G3      | -                            | -                 | -                 | -                  | -9.51, 86         | -8.30, 454         |
| ATP5H       | -                            | -                 | -                 | -                  | -7.78, 331        | -                  |
| ATP5J       | -                            | -                 | -                 | -                  | -9.40, 93         | -                  |
| ATP5J2      | -                            | -7.89, 837        | -                 | -7.95, 529         | -6.73, 724        | -7.57, 754         |
| ATP5L       | -                            | -                 | -                 | -7.64, 645         | -7.96, 282        | -7.90, 593         |
| ATP5O       | -                            | -                 | -10.29, 210       | -                  | -10.02, 56        | -7.98, 554         |
| ATP6AP1     | -                            | -                 | -                 | -                  | -                 | -8.57, 373         |
| ATP6V0A1    | -7.46, 382                   | -                 | -                 | -                  | -                 | -                  |
| ATP6V0B     | -                            | -8.03, 783        | -                 | -                  | -                 | -8.66, 351         |
| ATP6V0C     | -                            | -                 | -                 | -                  | -                 | -8.42, 413         |
| ATP6V0D1    | -6.85, 469                   | -                 | -                 | -                  | -                 | -7.98, 557         |
| ATP6V0E1    | 8.39, 256                    | -                 | -                 | 10.52, 84          | -                 | -                  |
| ATP6V1A     | -13.50, 21                   | -                 | -                 | -                  | -                 | -8.57, 371         |
| ATP6V1B2    | -9.30, 163                   | -                 | -9.13, 424        | -8.30, 424         | -7.43, 429        | -11.43, 40         |
| ATP6V1C1    | -13.39, 22                   | -                 | -8.80, 529        | -                  | -6.90, 644        | -7.51, 784         |
| ATP6V1D     | -                            | -                 | -                 | -7.29, 814         | -                 | -                  |
| ATP6V1E1    | -                            | -                 | -11.26, 120       | -9.01, 247         | -6.63, 761        | -11.36, 44         |
| ATP6V1F     | -                            | -                 | -                 | -8.51, 364         | -                 | -8.75, 334         |
| ATP6V1G2    | -7.37, 395                   | -                 | -                 | -9.66, 167         | -                 | -12.28, 22         |
| ATP6V1H     | -                            | -                 | -8.46, 666        | -                  | -7.50, 411        | -                  |
| COX3        | -                            | -                 | -                 | 8.63, 324          | -                 | -                  |
| COX4I1      | -                            | -                 | -8.88, 499        | -                  | -7.45, 423        | -                  |
| COX5A       | -7.43, 387                   | -                 | -                 | -                  | -7.16, 536        | -                  |
| COX5B       | -                            | -                 | -9.83, 275        | -                  | -9.21, 105        | -                  |
| COX6A1      | -                            | -                 | -                 | -                  | -6.81, 679        | -                  |
| COX6B1      | -                            | -                 | -9.81, 278        | -11.4, 45          | -7.13, 545        | -                  |
| COX6C       | -                            | -                 | -8.69, 574        | -                  | -8.16, 272        | -                  |
| COX7A2L     | -                            | -                 | -                 | -                  | -                 | -9.06, 270         |
| ND2         | -                            | -                 | -                 | -                  | -                 | 11.01, 60          |
| ND6         | -                            | -                 | -                 | -                  | 7.12, 549         | -                  |
| NDUFA1      | -                            | -                 | -                 | -                  | -7.99, 272        | -                  |
| NDUFA10     | -                            | -                 | -12.36, 59        | -                  | -                 | -                  |
| NDUFA11     | -                            | -                 | -                 | -                  | -                 | -7.78, 653         |
| NDUFA13     | -                            | -                 | -10.39, 196       | -                  | -                 | -                  |
| NDUFA2      | -                            | -                 | -                 | -                  | -8.85, 136        | -7.46, 819         |
| NDUFA3      | -                            | -9.48, 422        | -                 | -                  | -                 | -                  |
| NDUFA4      | -                            | -                 | -                 | -                  | -6.73, 721        | -                  |
| NDUFA5      | -                            | -                 | -                 | -                  | -10.60, 28        | -                  |

|                                     |            |            |             |            |            |             |
|-------------------------------------|------------|------------|-------------|------------|------------|-------------|
| NDUFA6                              | -          | -          | -9.28, 387  | -          | -          | -           |
| NDUFA8                              | -          | -          | -9.21, 403  | -8.00, 516 | -          | -8.14, 503  |
| NDUFA9                              | -          | -          | -8.96, 469  | -          | -7.51, 409 | -9.77, 162  |
| NDUFAB1                             | -          | -          | -8.69, 575  | -8.39, 393 | -6.97, 600 | -11.13, 54  |
| NDUFB10                             | -          | -          | -10.41, 192 | -          | -8.22, 226 | -           |
| NDUFB11                             | -          | -          | -           | -9.09, 239 | -          | -           |
| NDUFB4                              | -          | -8.66, 612 | -           | -          | -7.09, 560 | -           |
| NDUFB5                              | -          | -          | -           | -          | -7.82, 323 | -           |
| NDUFB6                              | -          | -          | -           | -          | -7.67, 366 | -           |
| NDUFB8                              | -          | -          | -9.11, 427  | -7.37, 778 | -          | -           |
| NDUFB9                              | -          | -          | -           | -          | -7.33, 463 | -           |
| NDUFC2                              | -          | -          | -           | -          | -9.66, 76  | -9.00, 279  |
| NDUFS2                              |            |            |             |            |            |             |
| NDUFS3                              | -          | -          | -10.55, 172 | -          | -7.98, 280 | -10.19, 110 |
| NDUFS4                              | -          | -          | -           | -          | -6.67, 744 | -           |
| NDUFS5                              | -          | -          | -10.68, 161 | -7.34, 786 | -8.12, 245 | -9.24, 234  |
| NDUFS6                              | -          | -          | -8.43, 674  | -          | -          | -           |
| NDUFS7                              | -          | -8.73, 600 | -8.94, 475  | -          | -          | -           |
| NDUFV2                              | -          | -          | -9.06, 438  | -          | -6.95, 617 | -8.15, 502  |
| PPA1                                | -          | -          | -           | -          | -8.03, 264 | -           |
| PPA2                                | -          | -          | -           | 7.49, 703  | -          | -           |
| SDHA                                | -          | -          | -10.81, 151 | -          | -8.57, 172 | -           |
| SDHB                                | -          | -          | -           | -          | -9.07, 115 | -           |
| UQCR10                              | -          | -          | -9.28, 386  | -          | -          | -7.60, 748  |
| UQCRC1                              |            |            |             |            |            |             |
| UQCRC2                              | -          | -          | -10.19, 220 | -          | -14.35, 1  | -9.12, 254  |
| UQCRFS1                             | -9.12, 179 | -          | -           | -          | -8.81, 140 | -           |
| UQCRH                               | -          | -          | -8.65, 591  | -9.60, 171 | -          | -9.68, 169  |
| UQCRCQ                              |            |            |             |            |            |             |
| Fisher's exact test <i>p</i> -value | -          | -          | 8.08E-09    | 2.41E-04   | 3.82E-21   | 6.46E-13    |

**Supplementary Table 15.3. Hits of KEGG Proteasome in six cases**

| Gene symbol | DEG ( <i>t</i> -score, rank) |                   |                   |                    |                   |                    |
|-------------|------------------------------|-------------------|-------------------|--------------------|-------------------|--------------------|
|             | AG<br>(741 genes)            | EC<br>(845 genes) | HC<br>(837 genes) | MTG<br>(829 genes) | PC<br>(764 genes) | SFG<br>(829 genes) |
| POMP        | -                            | -                 | -9.18, 410        | -                  | -6.74, 719        | -                  |
| PSMA1       | -                            | -                 | -8.18, 768        | -8.63, 328         | -8.91, 127        | -12.36, 16         |
| PSMA2       | -                            | -                 | -                 | -                  | -                 | -7.67, 708         |
| PSMA3       | -                            | -                 | -                 | -                  | -9.46, 90         | -                  |
| PSMA4       | -                            | -                 | -                 | -                  | -                 | -                  |
| PSMA5       | -5.31, 726                   |                   |                   |                    | -12.14, 7         | -9.18, 242         |
| PSMA6       | -                            | -                 | -                 | -                  | -                 | -                  |
| PSMA7       | -                            | -                 | -                 | -7.39, 764         | -                 | -7.92, 583         |
| PSMB1       | -                            | -                 | -10.54, 176       | -                  | -9.68, 76         | -                  |
| PSMB2       | -                            | -                 | -10.01, 244       | -                  | -                 | -8.93, 293         |

|                                     |            |   |             |            |            |            |
|-------------------------------------|------------|---|-------------|------------|------------|------------|
| PSMB3                               | -          | - | -9.96, 253  | -          | -7.93, 295 | -7.69, 693 |
| PSMB4                               | -          | - | -8.85, 510  | -          | -11.57, 11 | -          |
| PSMB5                               | -          | - | -           | -          | -8.67, 156 | -7.71, 680 |
| PSMB6                               | -          | - | -9.82, 276  | -          | -8.65, 160 | -          |
| PSMB7                               | -          | - | -           | -          | -10.99, 15 | -          |
| PSMC1                               | -          | - | -8.52, 639  | -          | -9.24, 102 | -8.42, 414 |
| PSMC2                               | -          | - | -8.55, 619  | -          | -7.85, 312 | -9.33, 213 |
| PSMC3                               | -          | - | -           | -          | -          | -          |
| PSMC4                               | -          | - | -           | -          | -          | -          |
| PSMC5                               | -          | - | -8.28, 725  | -8.12, 465 | -7.70, 357 | -          |
| PSMC6                               | -          | - | -           | -          | -          | -          |
| PSMD1                               | -          | - | -           | -9.28, 219 | -          | -8.63, 357 |
| PSMD2                               | -          | - | -           | -          | -          | -7.55, 765 |
| PSMD4                               | -          | - | -9.86, 271  | -          | -8.34, 206 | -          |
| PSMD6                               | -          | - | -           | -          | -7.87, 307 | -          |
| PSMD7                               | -7.75, 433 | - | -8.42, 676  | -          | -          | -          |
| PSMD8                               | -          | - | -           | -          | -7.82, 322 | -9.16, 247 |
| PSMD11                              | -          | - | -8.71, 567  | -          | -          | -          |
| PSMD12                              | -          | - | -13.21, 34  | -          | -7.54, 400 | -          |
| PSMD13                              | -          | - | -8.28, 728  | -10.55, 82 |            |            |
| PSMD14                              | -          | - | -10.19, 220 | -          |            |            |
| Fisher's exact test <i>p</i> -value | -          | - | 1.82E-08    | -          | 1.94E-09   | 1.47E-05   |

**Supplementary Table 15.4. Hits of KEGG pathway *Vibrio cholerae* infection in six cases**

| Gene symbol | DEG ( <i>t</i> -score, rank) |                   |                   |                    |                   |                    |
|-------------|------------------------------|-------------------|-------------------|--------------------|-------------------|--------------------|
|             | AG<br>(741 genes)            | EC<br>(845 genes) | HC<br>(837 genes) | MTG<br>(829 genes) | PC<br>(764 genes) | SFG<br>(829 genes) |
| ACTB        | -                            | -                 | -11.28, 119       | -13.82, 10         | -                 | -                  |
| ARF1        | -                            | -                 | -9.51, 332        | -                  | -                 | -                  |
| ATP6AP1     | -                            | -                 | -                 | -                  | -                 | -8.57, 373         |
| ATP6V0A1    | -7.46, 382                   | -                 | -                 | -                  | -                 | -                  |
| ATP6V0B     | -                            | -8.03, 783        | -                 | -                  | -                 | -8.66, 351         |
| ATP6V0C     | -                            | -                 | -                 | -                  | -                 | -8.42, 413         |
| ATP6V0D1    | -6.85, 469                   | -                 | -                 | -                  | -                 | -7.98, 557         |
| ATP6V0E1    | 8.39, 256                    | -                 | -                 | 10.52, 84          | -                 | -                  |
| ATP6V1A     | -13.51, 21                   | -                 | -                 | -                  | -                 | -8.57, 371         |
| ATP6V1B2    | -9.30, 163                   | -                 | -9.13, 424        | -8.30, 424         | -7.43, 429        | -11.43, 40         |
| ATP6V1C1    | -13.39, 22                   | -                 | -8.80, 529        | -                  | -6.90, 644        | -7.51, 784         |
| ATP6V1D     | -                            | -                 | -                 | -7.29, 814         | -                 | -                  |
| ATP6V1E1    | -                            | -                 | -11.26, 120       | -9.01, 247         | -6.63, 761        | -11.36, 44         |
| ATP6V1F     | -                            | -                 | -                 | -8.51, 364         | -                 | -8.75, 334         |
| ATP6V1G2    | -7.37, 395                   | -                 | -                 | -9.66, 167         | -                 | -12.28, 22         |
| ATP6V1H     | -                            | -                 | -8.46, 666        | -                  | -7.50, 411        | -                  |



|                                     |            |           |            |            |   |            |
|-------------------------------------|------------|-----------|------------|------------|---|------------|
| GNAS                                | -          | -         | -9.36, 358 | -9.63, 169 | - | -          |
| KDELR1                              | -          | 9.70, 379 | 10.37, 196 | 7.57, 675  | - | -          |
| KDELR2                              | -          | -         | -8.36, 696 | -          | - | -          |
| PRKACB                              | -9.76, 128 | -         | -          | -          | - | -7.47, 810 |
| PRKCB                               | -15.04, 7  | -         | -          | -          | - | -          |
| SEC61G                              | -          | -         | -8.55, 619 | -          | - | -          |
| TJP1                                | -          | -         | -          | 8.48, 369  | - | -          |
| TJP2                                | -          | 9.22, 484 | -          | 10.05, 131 | - | -          |
| Fisher's exact test <i>p</i> -value | 5.99E-03   | -         | 3.63E-03   | 4.00E-04   | - | 4.00E-04   |

**Supplementary Table 15.5. Hits of KEGG Pyruvate metabolism in six cases**

| Gene symbol                         | DEG ( <i>t</i> -score, rank) |                   |                   |                    |                   |                    |
|-------------------------------------|------------------------------|-------------------|-------------------|--------------------|-------------------|--------------------|
|                                     | AG<br>(741 genes)            | EC<br>(845 genes) | HC<br>(837 genes) | MTG<br>(829 genes) | PC<br>(764 genes) | SFG<br>(829 genes) |
| ACACA                               | -                            |                   | -8.97, 465        | -                  | -                 | -                  |
| ACACB                               | -                            |                   | -                 | 10.58, 78          | -                 | 9.37, 206          |
| ACAT1                               | -                            |                   | -8.98, 463        | -                  | -                 | -                  |
| ACYP2                               | -                            |                   | -9.30, 381        | -                  | -8.10, 254        | -                  |
| AKR1B1                              | -                            |                   | -8.17, 770        | -                  | -                 | -                  |
| DLD                                 | -                            |                   | -9.68, 296        | -                  | -9.16, 111        | -7.67, 706         |
| GLO1                                | -                            |                   | -8.27, 733        | -7.58, 674         | -10.09, 49        | -                  |
| GRHPR                               | -                            |                   | -8.96, 467        | -                  | -                 | -                  |
| HAGH                                | -                            |                   | -                 | -                  | -8.88, 131        | -                  |
| LDHA                                | -                            |                   | -                 | -                  | -                 | -10.06, 118        |
| LDHB                                | -                            |                   | -10.53, 178       | -                  | -9.08, 115        | -                  |
| MDH1                                | -9.66, 135                   |                   | -                 | -9.33, 206         | -8.31, 211        | -8.44, 407         |
| MDH2                                | -                            |                   | -8.85, 510        | -                  | -                 | -11.58, 36         |
| ME1                                 | -                            |                   | -                 | -                  | -6.85, 660        | -                  |
| ME3                                 | -                            |                   | -                 | -8.05, 489         | -                 | -7.46, 819         |
| PDHA1                               | -                            |                   | -8.53, 632        | -                  | -                 | -8.16, 497         |
| PDHB                                | -                            |                   | -                 | -                  | -7.21, 508        | -7.76, 657         |
| Fisher's exact test <i>p</i> -value | -                            | -                 | 2.89E-04          | -                  | 6.09E-03          | 3.37E-03           |

**Supplementary Table 15.6. Hits of KEGG TCA cycle in six cases**

| Gene symbol | DEG ( <i>t</i> -score, rank) |                   |                   |                    |                   |                    |
|-------------|------------------------------|-------------------|-------------------|--------------------|-------------------|--------------------|
|             | AG<br>(741 genes)            | EC<br>(845 genes) | HC<br>(837 genes) | MTG<br>(829 genes) | PC<br>(764 genes) | SFG<br>(829 genes) |
| ACLY        | -                            | -                 | -8.36, 696        | -                  | -                 | -                  |
| ACO2        | -                            | -                 | -9.57, 319        | -                  | -                 | -                  |
| DLD         | -                            | -                 | -9.68, 296        | -                  | -9.16, 101        | -7.67, 706         |
| FH          | -                            | -                 | -                 | -7.41, 749         | -7.21, 508        | -9.78, 156         |

|                                        |            |            |             |            |            |            |
|----------------------------------------|------------|------------|-------------|------------|------------|------------|
| IDH3A                                  | -8.50, 242 | -          | -12.07, 80  | -          | -          | -8.36, 437 |
| IDH3B                                  | -          | -          | -           | -          | -          | -7.46, 825 |
| IDH3G                                  | -          | -9.71, 378 | -8.04, 834  | -          | -          | -8.62, 358 |
| MDH1                                   | -9.66, 135 | -          | -           | -9.33, 206 | -8.31, 211 | -8.44, 407 |
| MDH2                                   | -          | -          | -8.85, 510  | -          | -          | -11.58, 36 |
| PDHA1                                  | -          | -          | -8.53, 632  | -          | -          | -8.16, 497 |
| PDHB                                   | -          | -          | -           | -          | -7.21, 508 | -7.76, 657 |
| SDHA                                   | -          | -          | -10.81, 151 | -          | -8.57, 172 | -          |
| SUCLA2                                 | -7.14, 420 | -          | -           | -          | -9.07, 115 | -8.98, 283 |
| Fisher's exact test<br><i>p</i> -value | -          | -          | 1.35E-03    | -          | 2.73E-02   | 1.37E-05   |

**Supplementary Table 16. Fifty-four “ALZ-only” hits in leading enriched KEGG pathways** *t*-scores (gene rank by FDR in bracket) of hits from leading KEGG pathways enriched in DEG sets of ALZ, but not of AG. Up(down)-regulated DEGs have *t*-score >( <) 0.

| “ALZ-only” hits |                   |                   |                   |                    |                   |                    |
|-----------------|-------------------|-------------------|-------------------|--------------------|-------------------|--------------------|
| Gene symbols    | AG<br>(741 genes) | EC<br>(845 genes) | HC<br>(837 genes) | MTG<br>(829 genes) | PC<br>(764 genes) | SFG<br>(829 genes) |
| ACYP2           | -                 | -                 | -9.30 (381)       | -                  | -8.10 (254)       | -                  |
| ARPC1A          | -                 | -                 | -12.55 (53)       | -                  | -6.82 (673)       | -7.54 (767)        |
| ATP5A1          | -                 | -                 | -8.71 (562)       | -                  | -10.06 (49)       | -                  |
| ATP5B           | -                 | -                 | -9.64 (303)       | -                  | -12.47 (2)        | -7.83 (632)        |
| ATP5C1          | -                 | -                 | -                 | -8.77 (279)        | -10.20 (42)       | -7.91 (592)        |
| ATP5G3          | -                 | -                 | -                 | -                  | -9.51 (86)        | -8.30 (454)        |
| ATP5J2          | -                 | -7.89 (837)       | -                 | -7.95 (529)        | -6.73 (724)       | -7.57 (754)        |
| ATP5L           | -                 | -                 | -                 | -7.64 (645)        | -7.96 (282)       | -7.90 (593)        |
| ATP5O           | -                 | -                 | -10.29 (210)      | -                  | -10.02 (56)       | -7.98 (554)        |
| ATP6V1E1        | -                 | -                 | -11.26 (120)      | -9.01 (247)        | -6.63 (761)       | -11.36 (44)        |
| ATP6V1H         | -                 | -                 | -8.46 (666)       | -                  | -7.50 (411)       | -                  |
| COX4I1          | -                 | -                 | -8.88 (499)       | -                  | -7.45 (423)       | -                  |
| COX5B           | -                 | -                 | -9.83 (275)       | -                  | -9.21 (105)       | -                  |
| COX6B1          | -                 | -                 | -9.81 (278)       | -11.42 (45)        | -7.13 (545)       | -                  |
| COX6C           | -                 | -                 | -8.69 (574)       | -                  | -8.16 (238)       | -                  |
| DLD             | -                 | -                 | -9.68 (296)       | -                  | -9.16 (111)       | -7.67 (706)        |
| FH              | -                 | -                 | -                 | -7.41 (749)        | -7.21 (508)       | -9.78 (156)        |
| GLO1            | -                 | -                 | -8.27 (733)       | -7.58 (674)        | -10.09 (49)       | -                  |
| IDH3G           | -                 | -9.71 (378)       | -8.04 (834)       | -                  | -                 | -8.62 (358)        |
| LDHB            | -                 | -                 | -10.53 (178)      | -                  | -9.08 (115)       | -                  |
| MDH2            | -                 | -                 | -8.85 (510)       | -                  | -                 | -11.58 (36)        |
| NDUFA2          | -                 | -                 | -                 | -                  | -8.85 (136)       | -7.46 (819)        |
| NDUFA8          | -                 | -                 | -9.21 (403)       | -8.00 (516)        | -                 | -8.14 (503)        |
| NDUFA9          | -                 | -                 | -8.96 (469)       | -                  | -7.51 (409)       | -9.77 (162)        |
| NDUFAB1         | -                 | -                 | -8.69 (575)       | -8.39 (393)        | -6.97 (600)       | -11.13 (54)        |
| NDUFB10         | -                 | -                 | -10.41 (192)      | -                  | -8.22 (226)       | -                  |
| NDUFC2          | -                 | -                 | -                 | -                  | -9.66 (76)        | -9.00 (279)        |
| NDUFS3          | -                 | -                 | -10.55 (172)      | -                  | -7.98 (280)       | -10.19 (110)       |
| NDUFS5          | -                 | -                 | -10.68 (161)      | -7.34 (786)        | -8.12 (245)       | -9.24 (234)        |
| NDUFV2          | -                 | -                 | -9.06 (438)       | -                  | -6.95 (617)       | -8.15 (502)        |
| PDHA1           | -                 | -                 | -8.53 (632)       | -                  | -                 | -8.16 (497)        |
| PDHB            | -                 | -                 | -                 | -                  | -7.21 (508)       | -7.76 (657)        |
| POMP            | -                 | -                 | -9.18 (410)       | -                  | -6.74 (719)       | -                  |
| PSMA1           | -                 | -                 | -8.18 (768)       | -8.63 (328)        | -8.91(127)        | -12.36 (16)        |
| PSMB1           | -                 | -                 | -10.54 (176)      | -                  | -9.68 (76)        | -                  |

|        |   |   |              |             |             |             |
|--------|---|---|--------------|-------------|-------------|-------------|
| PSMB2  | - | - | -10.01 (244) | -           | -           | -8.93 (293) |
| PSMB3  | - | - | -9.96 (253)  | -           | -7.93 (295) | -7.69 (693) |
| PSMB4  | - | - | -8.85 (510)  | -           | -11.57 (11) | -           |
| PSMB5  | - | - | -            | -           | -8.67 (156) | -7.71 (680) |
| PSMB6  | - | - | -9.82 (276)  | -           | -8.65 (160) | -           |
| PSMC1  | - | - | -8.52 (639)  | -8.12 (465) | -9.24 (102) | -8.42 (414) |
| PSMC2  | - | - | -8.55 (619)  | -           | -7.85 (312) | -9.33 (213) |
| PSMC5  | - | - | -8.28 (725)  | -           | -7.70 (357) | -           |
| PSMD12 | - | - | -13.21 (34)  | -           | -7.54 (400) | -7.55 (765) |
| PSMD4  | - | - | -9.86 (271)  | -           | -8.34 (206) | -           |
| PSMD8  | - | - | -            | -           | -7.82 (322) | -9.16 (247) |
| SDHA   | - | - | -10.81 (151) | -           | -8.57 (172) | -           |
| TUBA1B | - | - | -9.16 (418)  | -8.03 (500) | -7.53 (405) | -7.54 (769) |
| TUBA1C | - | - | -9.08 (436)  | -8.05 (487) | -7.81 (324) | -           |
| TUBB   | - | - | -12.66 (47)  | -           | -7.24 (491) | -9.91 (136) |
| TUBB3  | - | - | -            | -8.67 (308) | -6.94 (621) | -7.71 (679) |
| UQCR10 | - | - | -9.28 (386)  | -           | -           | -7.60 (748) |
| UQCRC2 | - | - | -10.19 (220) | -           | -14.35 (1)  | -9.12 (254) |
| UQCRH  | - | - | -8.65 (591)  | -9.60 (171) | -           | -9.68 (169) |

**Supplementary Table 17. Metrics of *REST* gene of AG and five ALZ datasets** Gene is not a DEG in any of the datasets and is up-regulated in all cases.

|             | Dataset | <i>t</i> -score | <i>p</i> -value | FDR      | FC    | DEG (up/down) | FDR thresholds in our study |
|-------------|---------|-----------------|-----------------|----------|-------|---------------|-----------------------------|
| <i>REST</i> | AG      | 4.23            | 3.66E-04        | 4.15E-03 | 0.695 | UP            | 7.50E-04                    |
|             | EC      | 4.39            | 2.43E-04        | 1.72E-03 | 0.545 | UP            | 4.00E-06                    |
|             | HC      | 5.00            | 9.01E-05        | 7.97E-04 | 0.756 | UP            | 1.00E-05                    |
|             | MTG     | 4.41            | 1.66E-04        | 1.22E-03 | 0.689 | UP            | 5.00E-06                    |
|             | PC      | 2.34            | 3.00E-02        | 7.23E-02 | 0.541 | UP            | 1.00E-04                    |
|             | SFG     | 4.96            | 6.68E-05        | 7.19E-04 | 0.914 | UP            | 1.25E-05                    |

**Supplementary Table 18. Comparison of DEG selection with authors of ALZ dataset**

Comparison of DEG selection in current study and in (Liang et al., 2008a) (case A), where the selection criteria were (Bonferroni & Hochberg)  $FDR > 1.00E-02$  and (approximately)  $|FC(\log_2)| > 0.58$ . In cases B and C, FDR threshold was determined by DEG set size. \*Only 395 genes selected from SFG in case B. Original and reduced datasets described in Supplementary Table 1.

| Dataset | A<br>Original set<br>From Supp. Mat.<br>in (Liang et al.,<br>2008a) |       | Analyzed by LIMMA                           |                   |                                  | Overlap      |                  |                  |
|---------|---------------------------------------------------------------------|-------|---------------------------------------------|-------------------|----------------------------------|--------------|------------------|------------------|
|         |                                                                     |       | FC >1, FDR<br>determined by<br>DEG set size | B<br>Original set | C<br>Reduced set<br>(this study) |              |                  |                  |
|         | Probes                                                              | Genes |                                             |                   |                                  | DEG set size | FDR<br>threshold | FDR<br>threshold |
| EC      | 4,025                                                               | 3,091 | 845                                         | 2.28E-04          | 4.00E-06                         | 777          | 751              | 609              |
| HC      | 5,308                                                               | 3,812 | 837                                         | 4.56E-03          | 1.00E-05                         | 798          | 790              | 336              |
| MTG     | 7,650                                                               | 5,443 | 829                                         | 1.39E-04          | 5.00E-06                         | 801          | 805              | 416              |
| PC      | 4,886                                                               | 3,592 | 764                                         | 1.27E-03          | 1.00E-04                         | 691          | 717              | 359              |
| SFG     | 1,176                                                               | 972   | *829                                        | *1.00E-02         | 1.25E-05                         | 92           | 245              | 92               |

**Supplementary Table 19. Mitochondrial genes in OXPHOS, AD, PD, and HD pathways and in AG and ALZ DEG gene sets** Top box, number of six families of mitochondrial genes and other genes in the 10 gene sets. Bottom box, Distribution of pathway specific genes in the 10 gene sets. Abbreviation: ND, NADH dehydrogenase; NDU, NADH: ubiquinone oxidoreductase; SDH, succinate dehydrogenase complex; COX, cytochrome c oxidase; ATP, ATPase; UQCR, ubiquinol-cytochrome c reductase; OXP, OXPHOS; AD Alzheimer’s disease; PD, Parkinson’s disease; HD, Huntington’s disease. For complete list of genes see: Figshare database link at [10.6084/m9.figshare.8952938](https://www.figshare.com/figure/8952938)

| Gene            |      | KEGG gene sets |             |             |             | AG and ALZ DEG sets |             |             |              |             |              |
|-----------------|------|----------------|-------------|-------------|-------------|---------------------|-------------|-------------|--------------|-------------|--------------|
|                 |      | OXP<br>(133)   | AD<br>(171) | PD<br>(142) | HD<br>(193) | AG<br>(741)         | EG<br>(845) | HC<br>(837) | MTG<br>(829) | PC<br>(764) | SFG<br>(829) |
| Mitochondrial   | ND   | 7              | 0           | 7           | 0           | 0                   | 0           | 0           | 0            | 1           | 1            |
|                 | NDU  | 40             | 40          | 40          | 40          | 0                   | 5           | 13          | 5            | 17          | 10           |
|                 | SDH  | 4              | 4           | 4           | 4           | 0                   | 0           | 1           | 0            | 2           | 0            |
|                 | COX  | 24             | 20          | 20          | 20          | 1                   | 0           | 4           | 2            | 6           | 1            |
|                 | ATP  | 43             | 14          | 13          | 14          | 7                   | 4           | 7           | 10           | 13          | 17           |
|                 | UQCR | 9              | 9           | 9           | 9           | 1                   | 0           | 3           | 1            | 2           | 3            |
| Others          |      | 6              | 2           | 2           | 2           | 0                   | 0           | 0           | 1            | 1           | 0            |
| Common with OXP |      | 133            | 89          | 95          | 89          | 9                   | 9           | 28          | 19           | 42          | 32           |
| AD specific     |      | 0              | 68          | 0           | 0           | 8                   | 2           | 7           | 6            | 6           | 5            |
| PD specific     |      | 0              | 0           | 34          | 0           | 3                   | 2           | 3           | 2            | 4           | 1            |
| PD&HD specific  |      | 0              | 0           | 8           | 8           | 2                   | 0           | 5           | 1            | 5           | 3            |
| HD specific     |      | 0              | 0           | 0           | 83          | 1                   | 7           | 11          | 6            | 5           | 6            |

**Supplementary Table 20. The 32 novel AD genes**

By definition the DEG set and the gene list of KEGG AD pathway contain no novel AD genes.

| No. of 32 novel AD genes in curated gene sets                                       |          |          |          |          |          |          |
|-------------------------------------------------------------------------------------|----------|----------|----------|----------|----------|----------|
| dataset                                                                             | AG       | EC       | HC       | MTG      | PC       | SFG      |
| DEG                                                                                 | 0        | 2        | 25       | 10       | 28       | 21       |
| IGN                                                                                 | 10       | 12       | 17       | 13       | 9        | 6        |
| xIGN                                                                                | 14       | 22       | 22       | 18       | 15       | 9        |
| Enrichment Fisher exact <i>p</i> -value of original AD pathway                      |          |          |          |          |          |          |
| dataset                                                                             | AG       | EC       | HC       | MTG      | PC       | SFG      |
| DEG                                                                                 | -        | -        | 6.97E-08 | 3.42E-02 | 1.79E-15 | 5.59E-05 |
| IGN                                                                                 | 2.13E-05 | -        | 7.87E-03 | 1.82E-02 | 5.01E-02 | 7.94E-02 |
| xIGN                                                                                | 1.73E-04 | -        | 2.47E-04 | 5.51E-05 | -        | 3.20E-02 |
| Enrichment Fisher exact <i>p</i> -value of AD pathway augmented with novel AD genes |          |          |          |          |          |          |
| dataset                                                                             | AG       | EC       | HC       | MTG      | PC       | SFG      |
| DEG                                                                                 | -        | -        | 1.90E-24 | 1.24E-05 | 3.38E-38 | 2.50E-17 |
| IGN                                                                                 | 9.86E-12 | 4.94E-08 | 3.42E-12 | 1.01E-08 | 8.52E-06 | 2.86E-04 |
| xIGN                                                                                | 4.31E-10 | 8.86E-11 | 9.22E-14 | 9.60E-13 | 3.40E-06 | 5.10E-05 |
